# Supplementary material for: Tracking solid electrolyte interphase dynamics using operando fibre-optic infra-red spectroscopy and multivariate curve regression
Source: Springer Nature journal article supplement (doi:10.1038/s41467-024-55339-y), 2025-01-17
Supplement: MOESM1 [file 41467_2024_55339_MOESM1_ESM.pdf]

1 Tracking solid electrolyte interphase dynamics using operando fibre-  
2 optic infrared spectroscopy and multivariate curve regression

3 C. Leau<sup>1,2,3</sup>, Y. Wang<sup>1,2</sup>, C. Gervillie-Mouravieff<sup>1,2</sup>, S. T. Boles<sup>4</sup>, X. H. Zhang<sup>5</sup>, S. Coudray<sup>5</sup>, C. Boussard-  
4 Plédel<sup>5</sup>, J.-M. Tarascon<sup>1,2,3\*</sup>

5 <sup>1</sup>Chimie du Solide et de l'Énergie, UMR 8260, Collège de France, Paris, France.

6 <sup>2</sup>Réseau sur le Stockage Electrochimique de l'Énergie (RS2E), FR CNRS 3459, France.

7 <sup>3</sup>Sorbonne Université–Université Pierre-et-Marie-Curie Paris (UPMC), Paris, France.

8 <sup>4</sup>Department of Energy and Process Engineering, Faculty of Engineering, Norwegian University of  
9 Science and Technology (NTNU), Trondheim, Norway.

10 <sup>5</sup>Institut des Sciences Chimiques de Rennes (ISCR), UMR 6226, Univ. Rennes, CNRS, Rennes, France.

11 \*Corresponding author: jean-marie.tarascon@college-de-france.fr

12

13 **Supplementary: Solvent Reference Spectra**

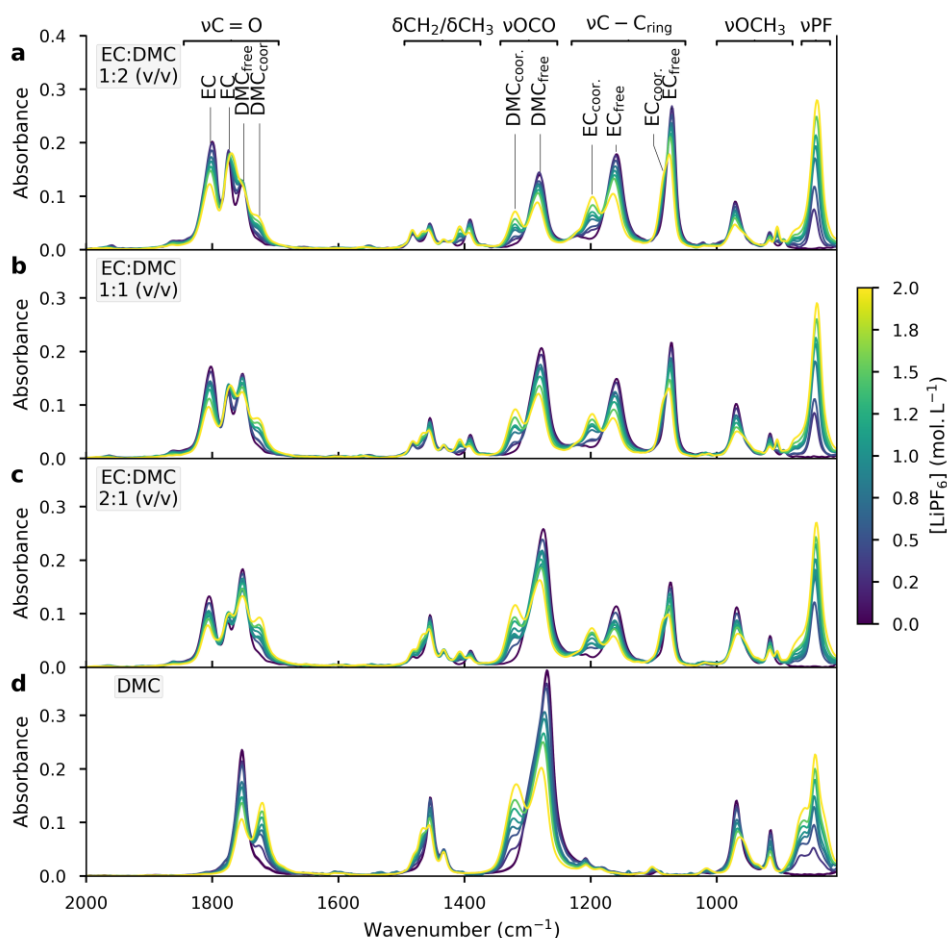

14

15 Supplementary Fig. 1. Electrolyte calibration reference spectra, with  $\text{LiPF}_6$  concentration from 0.0 M to 2.0 M, using EC:DMC  
16 as solvent with ratio of **a**, 1:2; **b**, 1:1 and **c**, 2:1 (v/v); **d**, using DMC as solvent.

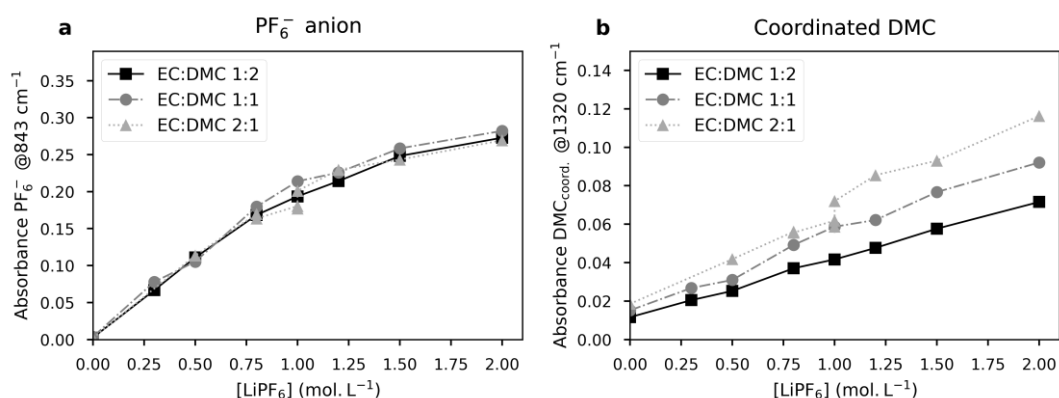

17

18 Supplementary Fig. 2. Electrolyte spectrum evolution as changing  $\text{LiPF}_6$  concentration in EC:DMC at various ratio (v/v), tracked  
19 by : **a**, the  $\text{PF}_6^-$  anion at  $843\text{ cm}^{-1}$ , **b**, the band associated to salt-coordinating DMC at  $1320\text{ cm}^{-1}$ .

20 As depicted in Supplementary Fig. 2a, the  $\text{PF}_6^-$  anion band at  $843\text{ cm}^{-1}$  appears when salt is added to  
21 the solvent, and its intensity grows when increasing the concentration. However, contrary to the  
22 coordinated solvent bands such as reported in Supplementary Fig. 2b, which displays a steady linear  
23 increase with increasing concentration, the anion band deviates from Beer-Lambert's law above  
24  $1\text{ mol. L}^{-1}$ . Therefore, the analysis range was limited to  $900\text{ cm}^{-1}$  to exclude this band from the MCR-  
25 ALS.

26 **Supplementary: Pictures of the experimental setup**

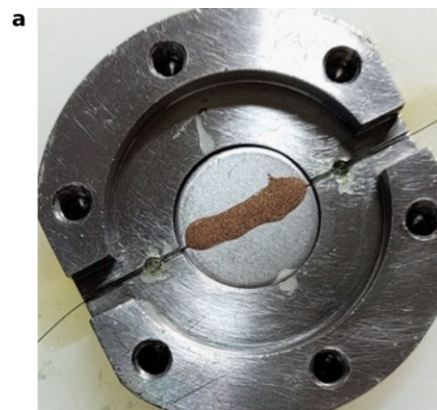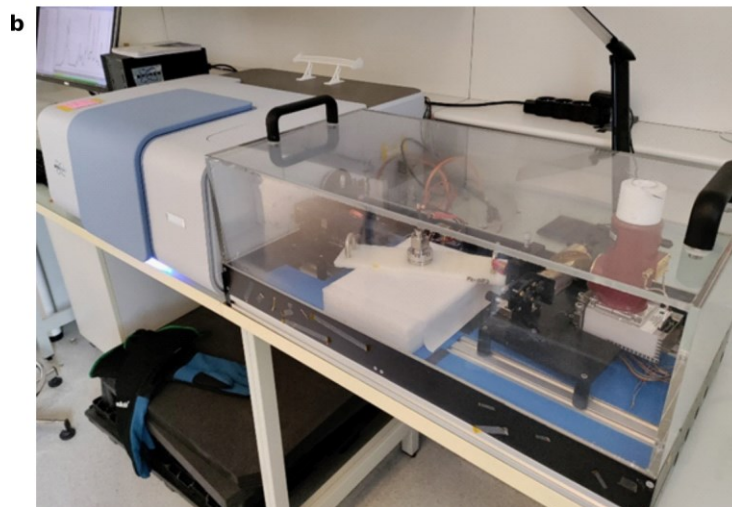

29

28 Supplementary Fig. 3. **a** Bottom part of the operando cell, the electrode material covers the central part of the fibre (here copper/PVDF). **b** FTIR spectrometer (left) with a fibre testing custom module (right).

30 **Supplementary: Capacity of the cells presented – Cu-PVDF | Various electrolytes | Li Metal**

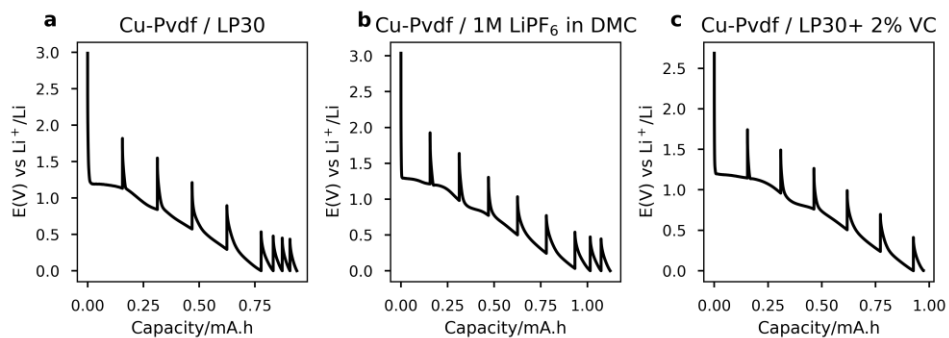

32

32 Supplementary Fig. 4. Reduction capacity for three electrolytes (**a** LP30, **b** 1M LiPF<sub>6</sub> in DMC, and **c** LP30+ 2 wt.% VC). The electrode material is Cu-PVDF, the GITT protocol is applied with a current of 206 μA.

34 An electrode consisting of 90 mg of metallic copper corresponds to a copper volume of 10<sup>-2</sup> cm<sup>3</sup> or 10<sup>10</sup>  
35 μm<sup>3</sup>. Considering particles of diameter 100 μm, the individual particule volume is 5 × 10<sup>5</sup> μm<sup>3</sup>,  
36 corresponding to 2 × 10<sup>4</sup> particles in the electrode. Consequently, the resulting electrode surface is  
37 6 cm<sup>2</sup>. Ultimately, the order of magnitude of surfacic current applied is 3 × 10<sup>-2</sup> mA/cm<sup>2</sup>.

38 **Supplementary: X-ray photoelectron spectroscopy (XPS) of Cu-PdVf and TAS fibres samples**

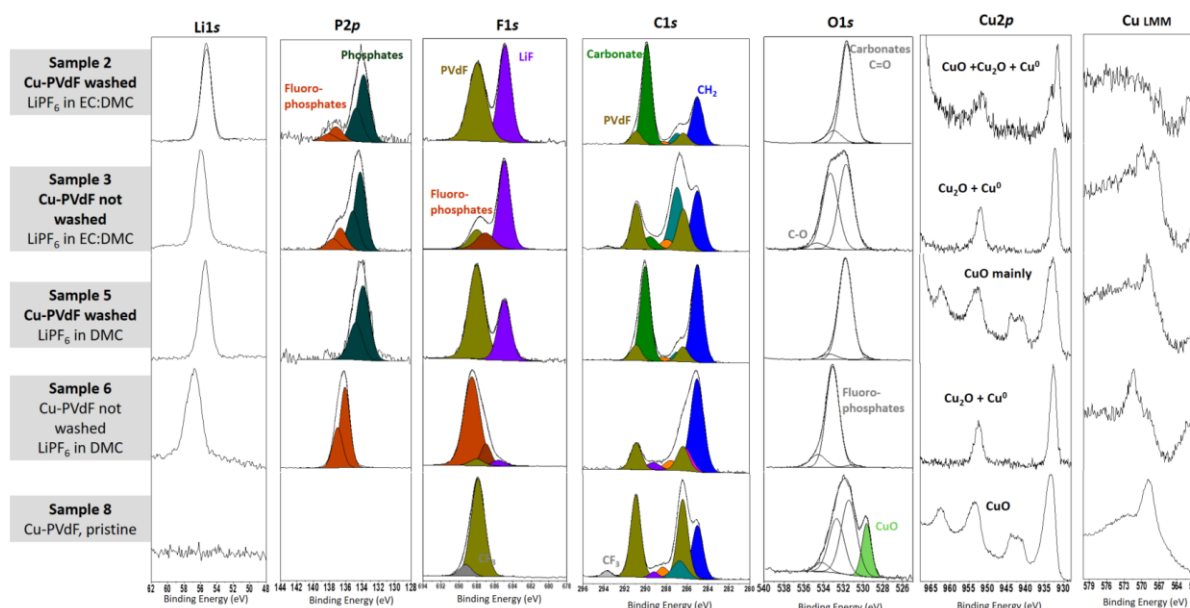

39

| XPS Quantification          |                     | C    | C PVdF | O (Cu) | O    | Cu  | F PVdF | F LiF | F Fluoro | P Phosph | P Fluoroph | Li   |
|-----------------------------|---------------------|------|--------|--------|------|-----|--------|-------|----------|----------|------------|------|
| LiPF <sub>6</sub> in EC:DMC | Sample 2 washed     | 18.4 | 3      | 0.2    | 37.1 | 0.1 | 3.1    | 2.8   |          | 0.6      | 0.1        | 34.6 |
|                             | Sample 3 not washed | 10.9 | 5.6    | 0.1    | 11.8 | 0.3 | 6.2    | 22.2  | 5.9      | 2.5      | 0.8        | 33.8 |
| LiPF <sub>6</sub> in DMC    | Sample 5 washed     | 22.4 | 3.4    | 0.5    | 35.4 | 0.5 | 3.7    | 1.9   |          | 0.5      |            | 31.8 |
|                             | Sample 6 not washed | 4.5  | 1.5    |        | 22.4 | 0.3 | 1.8    | 1.5   | 32.6     |          | 13.6       | 21.8 |
| Pristine                    | Sample 8 pristine   | 20.1 | 32.4   | 1.6    | 6.5  | 2.4 | 36.9   |       |          |          |            |      |

40 Supplementary Fig. 5: XPS of ex-situ copper-PVDF samples after undergoing intermittent reduction: cycled in 1M LiPF<sub>6</sub> in  
 41 EC:DMC electrolyte and washed with DMC (Sample 2); cycled in 1M LiPF<sub>6</sub> in EC:DMC electrolyte without DMC wash  
 42 (Sample 3); cycled in 1M LiPF<sub>6</sub> in DMC electrolyte and washed with DMC (Sample 5); cycled in 1M LiPF<sub>6</sub> in DMC electrolyte  
 43 without DMC wash (Sample 6); stored in 1M LiPF<sub>6</sub> in DMC electrolyte without cycling and washed with DMC (Sample 8);

44 We compare the ex-situ XPS spectra of our post-mortem Cu-PVDF samples (Supplementary Fig. 5) with  
 45 what is reported in the literature [Dedryvère, R. et al., *J. Phys. Chem. B* **109** (2005)]. On O1s level, both  
 46 Li<sub>2</sub>CO<sub>3</sub> and alkyl carbonates are characterized by a main peak at 532 eV attributed to COOLi, while alkyl  
 47 carbonates and LEDC display an additional shoulder at 533.5 eV corresponding to C-O. Our samples  
 48 display the main peak at 532 eV with only a minute intensity of the 533.5 eV shoulder, indicating that  
 49 Li<sub>2</sub>CO<sub>3</sub> is predominant. This is confirmed by the C1s level: the spectra displays a high intensity peak at  
 50 289.9 eV attributed to the carbon of the carbonate function (R-O<sub>2</sub>CO<sup>-</sup>), but only little intensity  
 51 286.5 eV attributed to C-O. Therefore the carbonate group is primarily comprised of Li<sub>2</sub>CO<sub>3</sub>, for both  
 52 DMC and EC:DMC electrolyte. While this apparently contradicts the IR observations, such a  
 53 discrepancy can be explained by aging of the samples between their preparation and the XPS  
 54 measurement.

55 Considering the F1s level, the fluorophosphates peak disappears after DMC-washing, which effectively  
 56 removes the remaining LiPF<sub>6</sub> salt, confirmed by the evolution of the P2p spectrum. The cleaned  
 57 electrodes show the PVDF binder peak at 687.9 eV, as well as evidencing the formation of LiF (685.0  
 58 eV), which could not be identified from IR-FEWS alone, because of the similarity of its only band with  
 59 that of P-F.

60 The O1s level spectrum (peak at 529.4 eV) reveals the presence of copper oxide in the pristine sample,  
 61 more precisely identified as CuO considering the spectra of Cu2p and Cu Auger levels. After cycling,  
 62 the O1s copper oxide peak is no longer detected, masked by the SEI covering the sample, which is  
 63 confirmed by the overall decreased intensity of the Cu2p peaks (Cu quantified at 2.4% for pristine  
 64 sample, and below 0.5% for cycled samples). In non-washed samples (3 and 6), these spectra indicate  
 65 a majority of either Cu<sub>2</sub>O or Cu<sup>0</sup> (both showing similar Cu2p peaks but confirmed by the different Auger  
 66 features), while CuO is no longer detected, in line with the aforementioned copper oxide reduction.  
 67 Surprisingly, CuO is still detected in DMC-washed sample 5, whether because Cu<sub>2</sub>O/Cu was washed  
 68 away or by later unintentionally reoxidation.

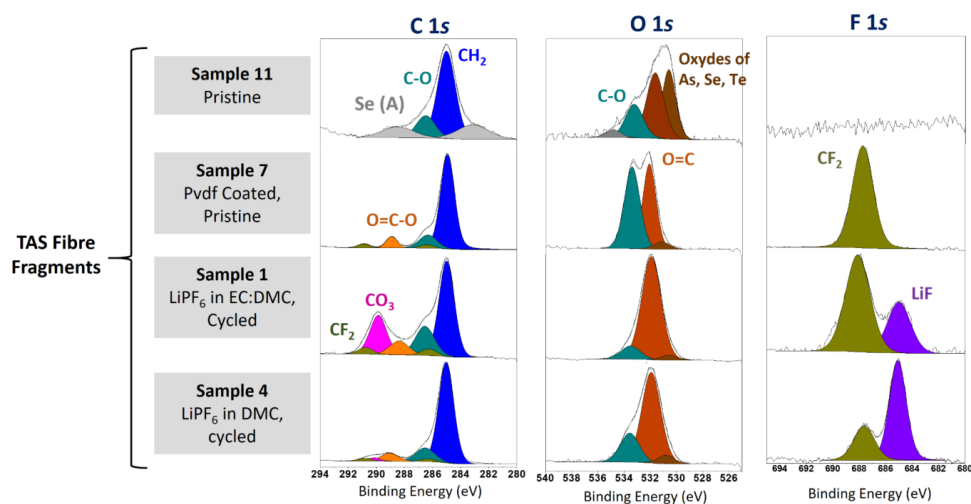

69

|                                                     | C    | O    | F   | Li   | As  | Te  |
|-----------------------------------------------------|------|------|-----|------|-----|-----|
| <b>Sample 7 - Pristine-PVDF</b>                     | 78.1 | 12.8 | 5.8 | 1.3  | 0.1 | 0.9 |
| <b>Sample 1 - LiPF<sub>6</sub> in EC:DMC cycled</b> | 42.2 | 36   | 1.5 | 14.2 | 0.5 | 1.1 |
| <b>Sample 4 - LiPF<sub>6</sub> in DMC cycled</b>    | 55.6 | 19.5 | 7.4 | 12   | 0.5 | 0.8 |

70 Supplementary Fig. 6. XPS of fragments of TAS fibre. Pristine fibre (Sample 11); pristine fiber embedded in a copper-PVDF  
 71 electrode and recovered without cell assembly (Sample 7); after undergoing intermittent reduction in 1M LiPF<sub>6</sub> in EC:DMC  
 72 electrolyte and washed with DMC (Sample 1); cycled in 1M LiPF<sub>6</sub> in 1M LiPF<sub>6</sub> in DMC electrolyte and washed with DMC  
 73 (Sample 4).

74 Finally, we measured XPS spectra of fragments of TAS fibre, either pristine (Sample 11), embedded and  
 75 recovered from the Cu-PVDF slurry (Sample 7), or recovered from a cycled cell (Samples 1 and 4), as  
 76 shown in Supplementary Fig. 6. Considering the F1s level, the samples with PVDF show the expected  
 77 characteristic peak at 688.8 eV. Strikingly, the cycled samples also show the LiF peak at 685 eV,  
 78 indicative of SEI deposition on the fibre.

79

80 **Supplementary: X-Ray Diffraction (XRD) pristine Cu-PdVf samples**

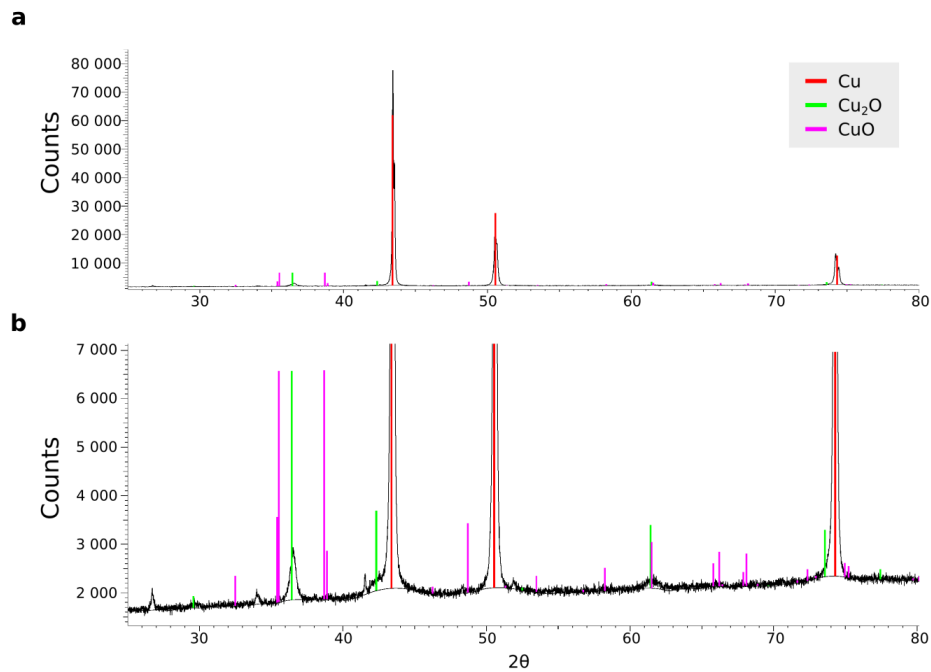

81

82 **Supplementary Fig. 7. Powder X-ray diffractogram of pristine copper powder.** **a** Complete diffractogram. **b** Zoom along the  
83 y-axis. Reference peaks of metallic copper (red), copper oxide (i) (green) and copper oxide (ii) (pink) are shown.

84 A X-ray diffractogram of pristine Cu powder is reported in Supplementary Fig. 7. A measurement on  
85 an overnight dried Cu-PVDF electrode was also performed, with an identical outcome. Besides the  
86 peaks of metallic copper (red) which dominate the diffractogram, low intensity peaks can be attributed  
87 to Cu<sub>2</sub>O (green), while CuO cannot be detected. This may appear incoherent with XPS observations of  
88 Supplementary Fig. 5, which concluded that a majority of CuO is present in the pristine sample, not  
89 Cu<sub>2</sub>O. Such a discrepancy can be reconciled by keeping in mind that XPS solely probes solely 50-100 Å  
90 of the Cu particles surfaces (the most oxidized state of Cu (CuO) while XRD probe a deeper part of the  
91 particles (less oxidized Cu<sub>2</sub>O). Likely, both oxides are involved in the process.

92

93

94 **Supplementary: Open circuit voltage of a pristine cell**

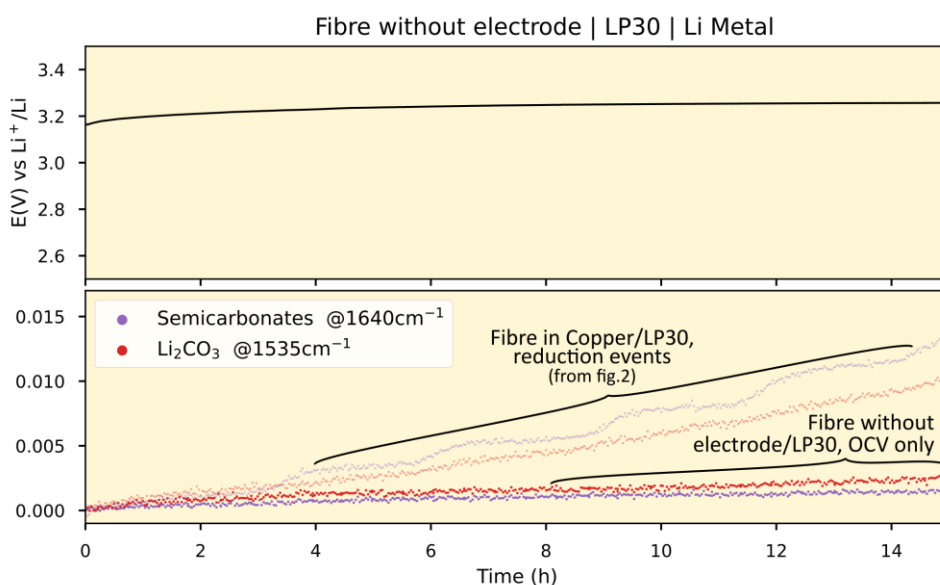

95  
96 Supplementary Fig. 8. OCV voltage profile (upper panel) of a TAS fibre |LP30|Li metal cell, without active electrode material  
97 on; detailed  $A(t)-A(t_0)$  absorbance variations (lower panel) for two selected wavenumbers representative of  $\text{Li}_2\text{CO}_3$  (1525  $\text{cm}^{-1}$ , red),  
98 and lithium semi-carbonates (1640  $\text{cm}^{-1}$ , purple). For comparison, we reproduce wavenumber tracking from Figure 2b  
99 (shaded).

100 **Supplementary: Discussing risk of electrochemical rate limitations**

101 Regarding possible risk of electrochemical rate limitations arising from the Li-metal counter electrode  
102 surface: while the Li-metal counter electrode surface will certainly have its own interfacial impedance  
103 that could control the impact electrochemical reduction step, this does not appear to be the case with  
104 this cell configuration and reduction protocol. The drop-cast working electrodes are paired with Li  
105 metal disks, giving rise to larger surface area for Li-metal than the working-material under  
106 investigation. Galvanostatic pulses ensure electron transfer through the working electrode of interest  
107 when currents are positive allowing, thus giving continuity between samples. We acknowledge that  
108 this may also drive spatial inhomogeneities that are yet to be well understood and may be, in part, a  
109 source for the differences observed herein. Nevertheless, this work establishes the viability and  
110 prospects for SEI characterization with IR-FEWS and future experiments can be designed to  
111 systematically understand how the choice of cathode material and electrochemical conditions (i.e.  
112 galvanostatic or potentiostatic) jointly impact the chemical composition and functionality of the SEI on  
113 the anode surface.

114 **Supplementary: Detailed MCR-ALS - LP30 reduction on copper powder**

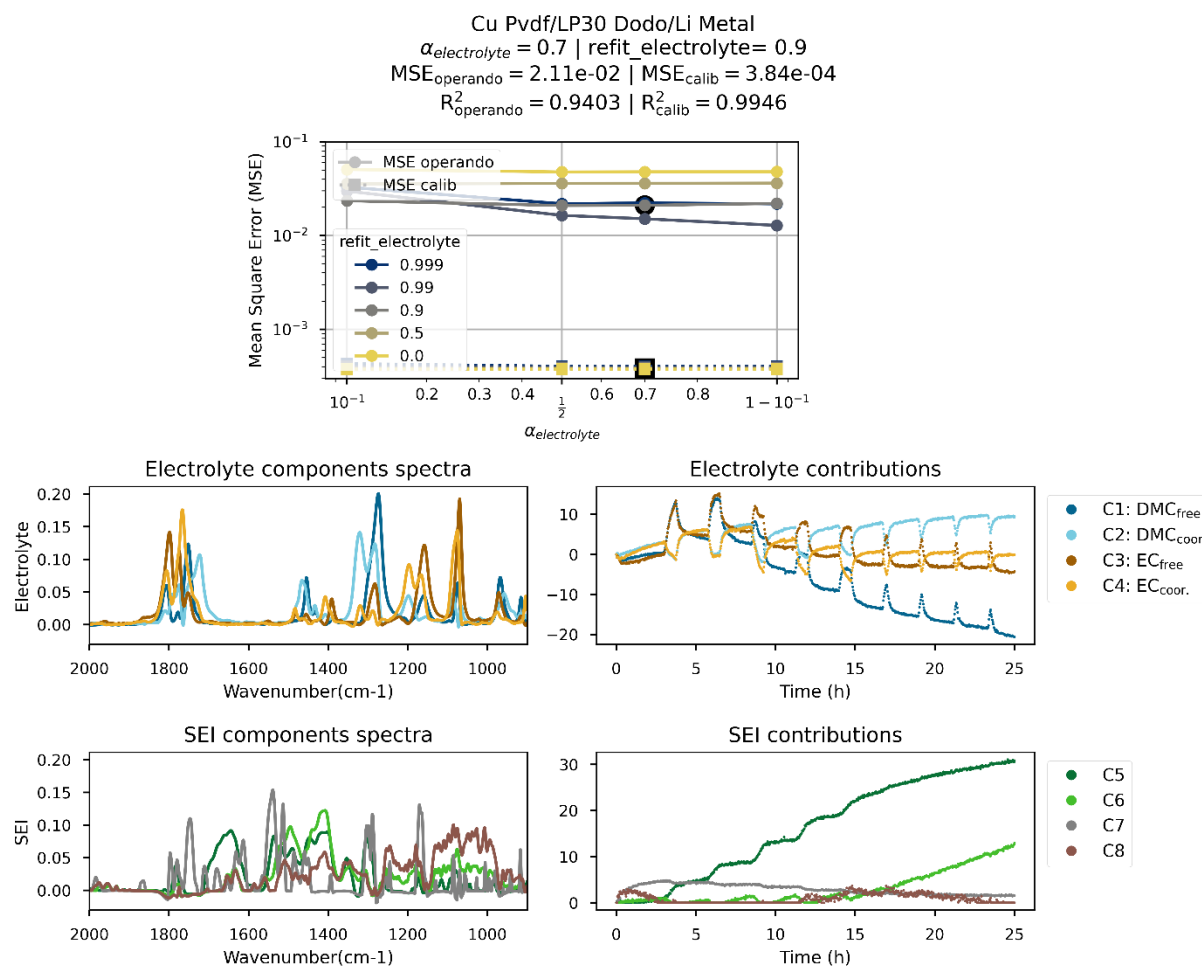

115

116 Supplementary Fig. 9. **Detailed MCR-ALS for the Cu-PVDF | LP30 | Li cell.** MSE of operando and calibration spectra (solid and  
 117 dashed lines, respectively), for several values of  $\alpha_{electrolyte}$  and electrolyte refitting parameter (upper panel). The  
 118 decomposition reported in the main text is highlighted with black markers, and detailed on the four lower panels: spectra  
 119 (left panels) and associated contributions (right panels) for electrolyte (middle panels) and SEI components (lower panels).



Cu PvdF/LP30 Dodo/Li Metal  
 $\alpha_{\text{electrolyte}} = 0.7$  |  $\text{refit\_electrolyte} = 0.9$   
 $MSE_{\text{operando}} = 2.11\text{e-}02$  |  $MSE_{\text{calib}} = 3.84\text{e-}04$

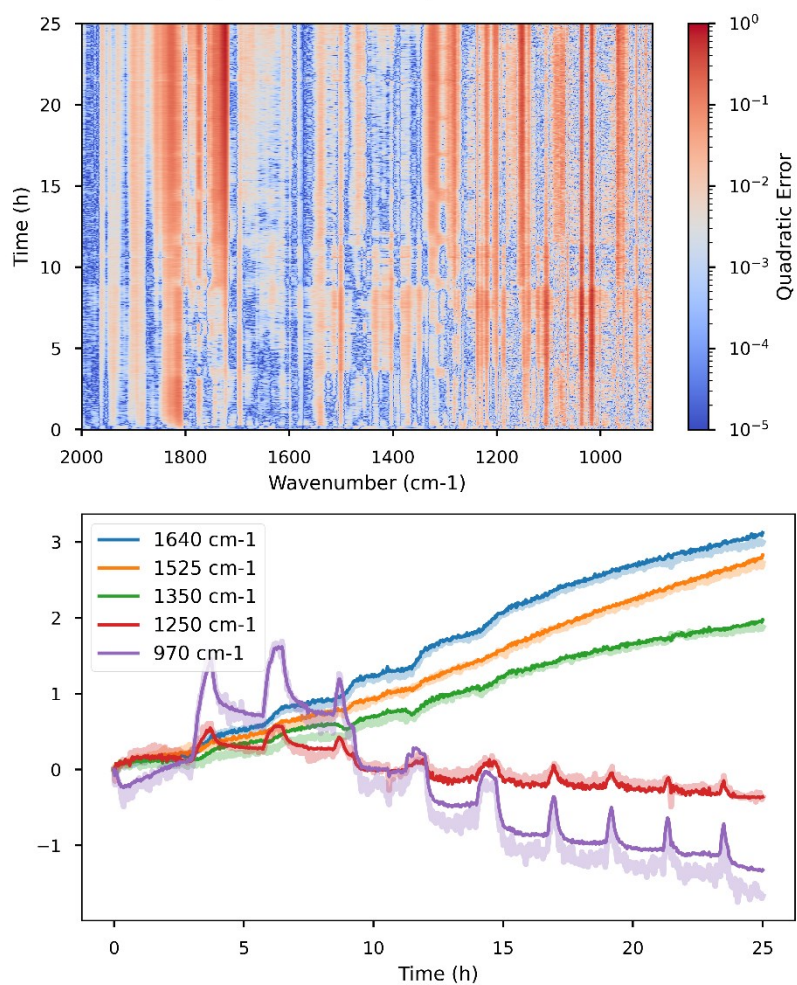

120

121 Supplementary Fig. 10. **Detailed MCR-ALS for the Cu-PVDF | LP30 | Li cell.** Quadratic error between operando data D and  
122 reconstructed from MCR-ALS (CS<sup>T</sup>) (upper panel). Comparison of operando data D (transparent lines) and reconstructed data  
123 from MCR-ALS (CS<sup>T</sup>) (solid lines) at selected wavenumbers.

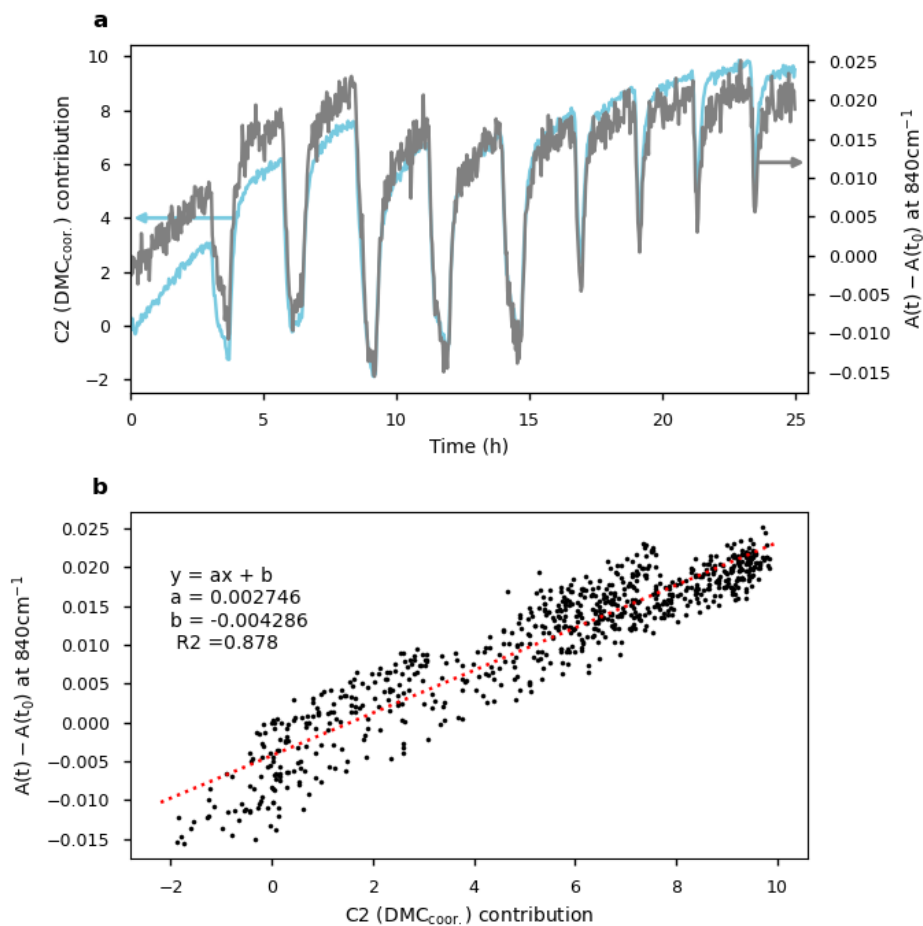

124

125 Supplementary Fig. 11. Copper-PVDF|LP30|Li Metal cell: **a**, contribution of the second MCR-ALS electrolyte component,  
 126 attributed to Li<sup>+</sup>-coordinating DMC (left axis, light blue),  $A(t)-A(t_0)$  variation of the PF<sub>6</sub><sup>-</sup> band tracked at 840 cm<sup>-1</sup> (right axis,  
 127 grey). Both variable show similar variations: Li<sup>+</sup> coordination effect matches anion absorbance variations. **b**, Correlation  
 128 between C2 (Li<sup>+</sup>-coordinating DMC component) and absorbance at 840 cm<sup>-1</sup>. A linear regression shows as red-dotted line.

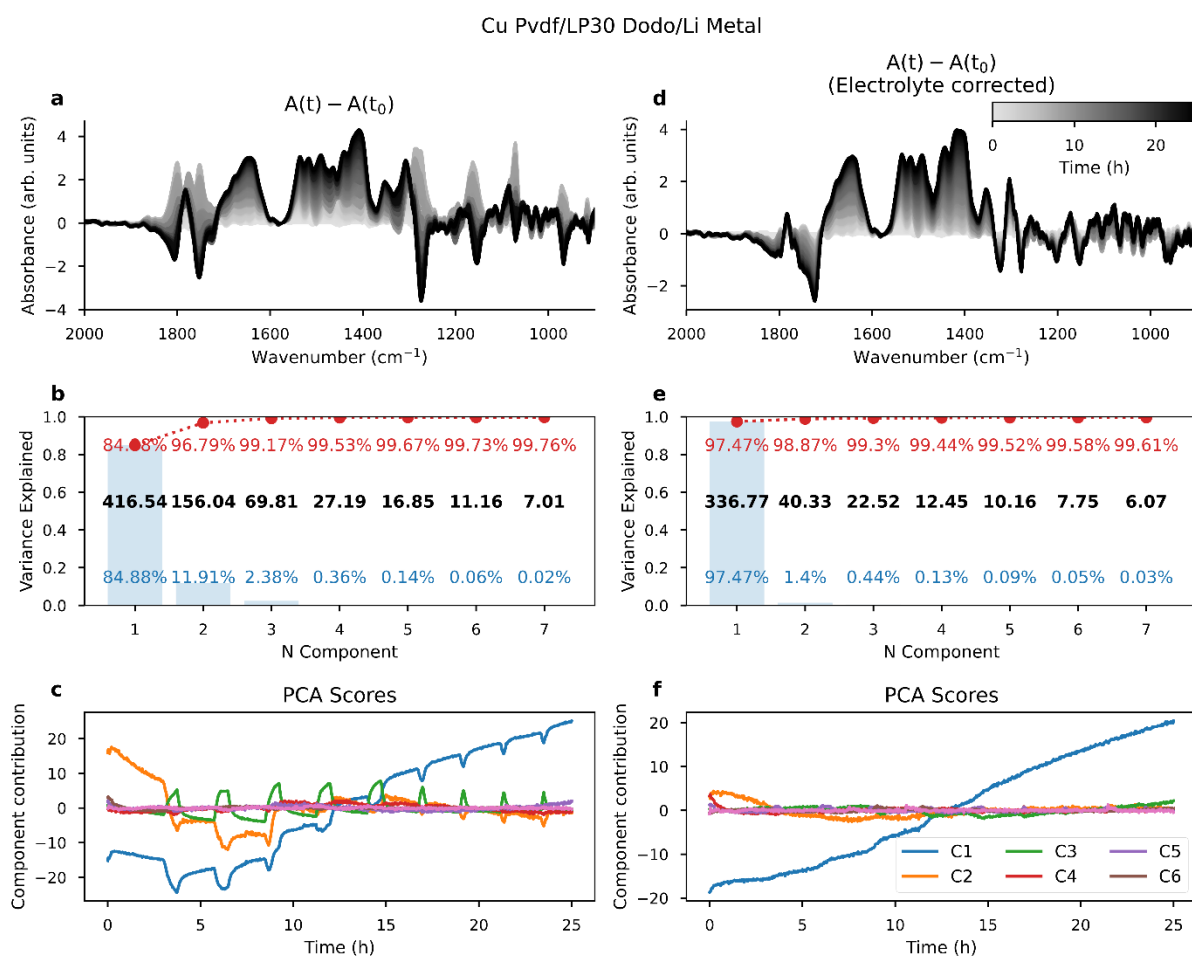

130

131 Supplementary Fig. 12. Discussing the choice of number of components for the SEI.

132 The choice of number of components for MCR-ALS was guided by a chemical rank analysis as well as  
 133 trial-and-error testing.

134 The many wavenumbers making the spectroscopic data do not evolve independently, but are linearly  
 135 related. Typically, two consecutive data points belonging to the same vibrational band show very  
 136 similar evolution. Linear factorization techniques like MCR-ALS extract these variations. It should be  
 137 discussed how many components are actually needed to describe these evolutions; in the linear  
 138 algebra formalism, this means determining the rank of the data matrix  $D$ , in other words, the number  
 139 of species showing linearly distinct evolution. In the case of experimental data, the presence of noise  
 140 or other nonlinearities (imperfect background fitting, ...) may also increase the mathematical rank,  
 141 which is why a chemical rank must be considered.

142 As standardly practiced<sup>26</sup> [Meloun et al. *Analytica Chimica Acta* (2000)], and shown in Supplementary  
 143 Fig. 12, Principal Components Analysis (PCA) was applied to the experimental data shown in **a**. The  
 144 orthogonal spectra components are represented in panel **b** by their singular value (black text),  
 145 contribution to variance (blue bar plot) and cumulative variance explained (red dashed line). Their  
 146 respective contributions score over time are shown in **c**. Hence, depending on the variance explained  
 147 threshold targeted, three to five components may be necessary to reconstruct the original data.

148 However, in the case of our data, we heavily constrain four components to the spectra to the original  
 149 electrolyte calibration of Figure 1. As a result, more components will be necessary. To determined how

150 many, we fitted and subtracted the electrolyte components to the operando data by Ordinary Least  
151 Square (OLS) regression, providing an approximated electrolyte contribution decoupled from SEI. The  
152 resulting data (Supplementary Fig. 12d) was similarly subjected to PCA, which results shows in  
153 subfigures e and f. Strikingly, on its own, the first component encapsulates 97.6% of the variability  
154 (blue in Supplementary Fig. 12e), showing that all SEI species are growing at quite similar rates.  
155 Additional smaller contributions components remains necessary to accurately model finer variations.

156 While PCA provides an estimation of the chemical rank, it should be noted that could not be directly  
157 translated to MCR-ALS component number. Firstly, PCA is systematically applied on mean-subtracted  
158 data, which was not the case in the MCR-ALS pipeline. Secondly, PCA spectral loadings are allowed to  
159 be negative, while we constrained MCR-ALS SEI components to positivity, hence requiring more  
160 components to achieve similar MSE. Finally, the constraint refitting and subtracting electrolyte from  
161 SEI component, which allows better electrolyte/SEI decoupling, was found to also increase the MSE  
162 compared to PCA, meaning a more interpretable decomposition comes at a cost of less accuracy in  
163 fitting the data.

164 For these reasons, the number of components was ultimately chosen by trial-and-error method,  
165 considering mean square error and interpretability of the spectra.

#### 166 **Supplementary: Washing the electrodes to evidence SEI**

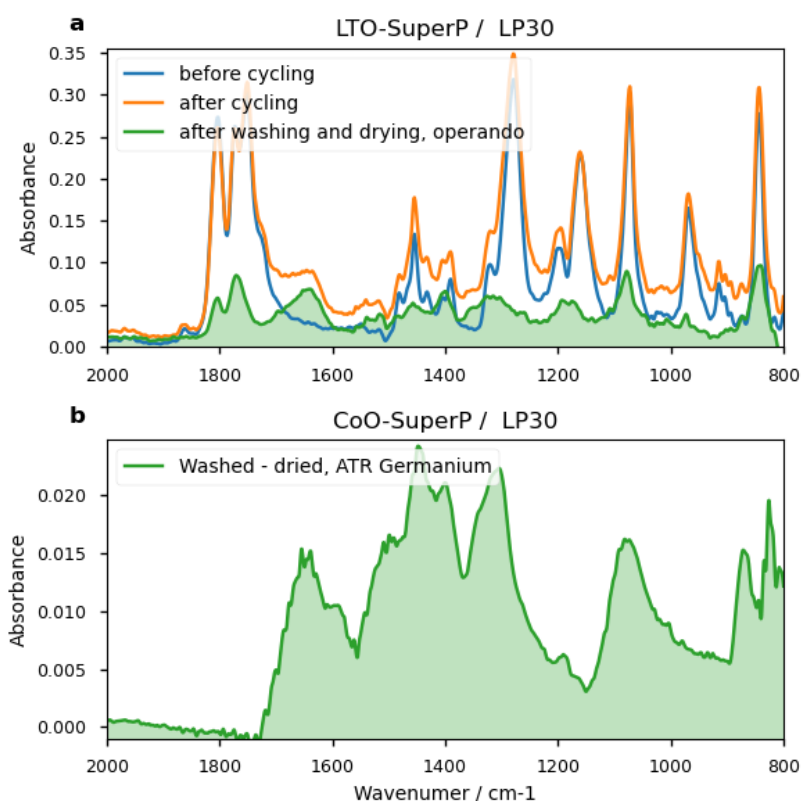

167

168 Supplementary Fig. 13. Ex-Situ post-mortem FTIR spectra of electrode materials. **a**, LTO/SuperP electrode cycled in LP30  
169 against Li metal in the TAS fibre operando cell: initial spectrum (blue); spectrum after cycling notably showing the semi-  
170 carbonate band at 1640 cm<sup>-1</sup> (orange); spectrum acquired after opening the cell, repeatedly rinsing the electrode with DMC  
171 and subsequent drying, EC bands appear with diminished intensity, while semi-carbonate band remains of a similar amplitude  
172 (green) **b**, CoO/SuperP electrode cycled in LP30 against Li metal, recovered, washed with DMC and dried under vacuum, and  
173 finally tested by ATR-FTIR (Ge crystal).

174 **Supplementary: Testing SEI Salt Solubility**

175 We used commercial  $\text{Li}_2\text{CO}_3$ . LMC and LEDC were synthesised by ourselves. Lithium ethylene  
176 monocarbonate, ( $\text{HOCH}_2\text{CH}_2\text{OCOO Li}$ , or LEMC) was also prepared, as it was recently discussed to be a  
177 potential SEI component instead of LEDC [Wang et al. *Nat. Chem.* (2019)], even though additional  
178 evidence would be necessary to fully confirm this hypothesis.

179 Preparation of LMC (inspired by [Wang et al. *Nat. Chem.* (2019)]):

180 To a Schlenk flask of magnetically-stirred anhydrous methanol (20 mL at  $0^\circ\text{C}$ ) was added 1.6M  
181 nBuLi/hex (16 mL, 25.6 mmol), dropwise. The reaction was let warm at room temperature ( $20^\circ\text{C}$ - $25^\circ\text{C}$ )  
182 and stirred for 30 minutes. Afterwards,  $\text{CO}_2$  was bubbled in the stirred reactional media for 2 hours,  
183 after which the remaining solvent was evaporated under vacuum, providing a white solid successively  
184 washed with dry acetonitril and dry diethyl ether, and dried under vacuum for at least 12 hours. It was  
185 obtained 1.65g of LMC (20.2 mmol, 79% yield).

186 Preparation of LEMC (inspired by [Wang et al. *Nat. Chem.* (2019)]):

187 To a Schlenk flask of magnetically-stirred anhydrous ethylene glycol (8 mL at  $0^\circ\text{C}$ ) was added 1.6M  
188 nBuLi/hex (10 mL, 16 mmol), dropwise. The reaction was let warm at room temperature ( $20^\circ\text{C}$ - $25^\circ\text{C}$ )  
189 and stirred for 30 minutes. Afterwards,  $\text{CO}_2$  was bubbled in the stirred reactional media for 3 hours,  
190 during which time hexane phase evaporated. Dry pyridine (20mL) was added to the flask which was  
191 left resting for 48 hours, during which time a solid deposit formed on the walls of the flask. The solid  
192 was recovered and successively washed with anhydrous acetonitril and anhydrous diethyl ether, and  
193 dried under vacuum for at least 12 hours. It was obtained 1.05 g of LMC (9.37 mmol, 59% yield).

194 Preparation of LEDC [Zhuang et al. *J. Phys. Chem. B* (2005)] :

195 To a Schlenk flask of magnetically-stirred 1.6M nBuLi/hex (10 mL, 16 mmol) in anhydrous diethylether  
196 was added 366 mg (5.9 mmol) of anhydrous ethylene glycol, dropwise, at  $0^\circ\text{C}$ . The reaction was let  
197 warm at room temperature ( $20^\circ\text{C}$ - $25^\circ\text{C}$ ) and stirred for 30 minutes. Afterwards,  $\text{CO}_2$  was bubbled in  
198 the stirred reactional media for 2 hours, until complete solvent evaporation. A white solid was  
199 recoverd, succesively washed with anhydrous acetonitril and anhydrous diethyl ether, and dried under  
200 vacuum for at least 12 hours.

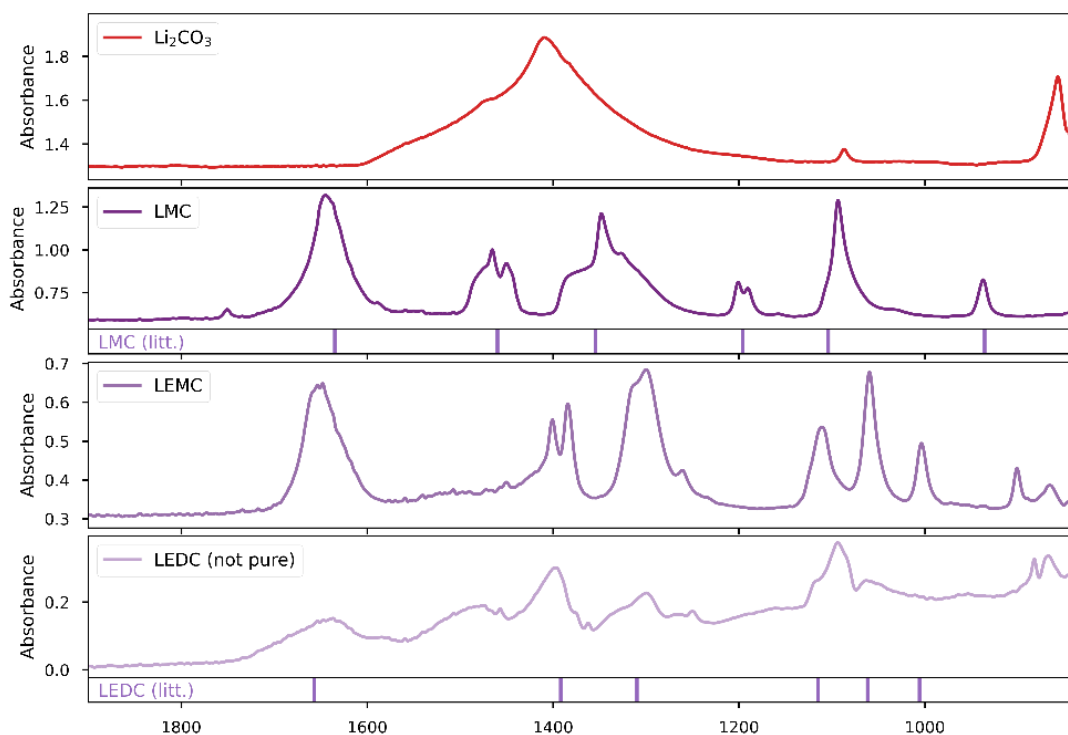

201

202 Supplementary Fig. 14. **a** ATR-FTIR (diamond) spectra of four lithium salts possibly present in the SEI:  $\text{Li}_2\text{CO}_3$  (commercial),  
 203 lithium methyl carbonate (LMC, synthesized by ourselves), lithium ethyl mono-carbonate ( $\text{OH-CH}_2\text{-CH}_2\text{-COOLi}$ , or LEMC,  
 204 synthesized by ourselves) and lithium ethyl dicarbonate (LEDC, synthesized by ourselves, not pure).

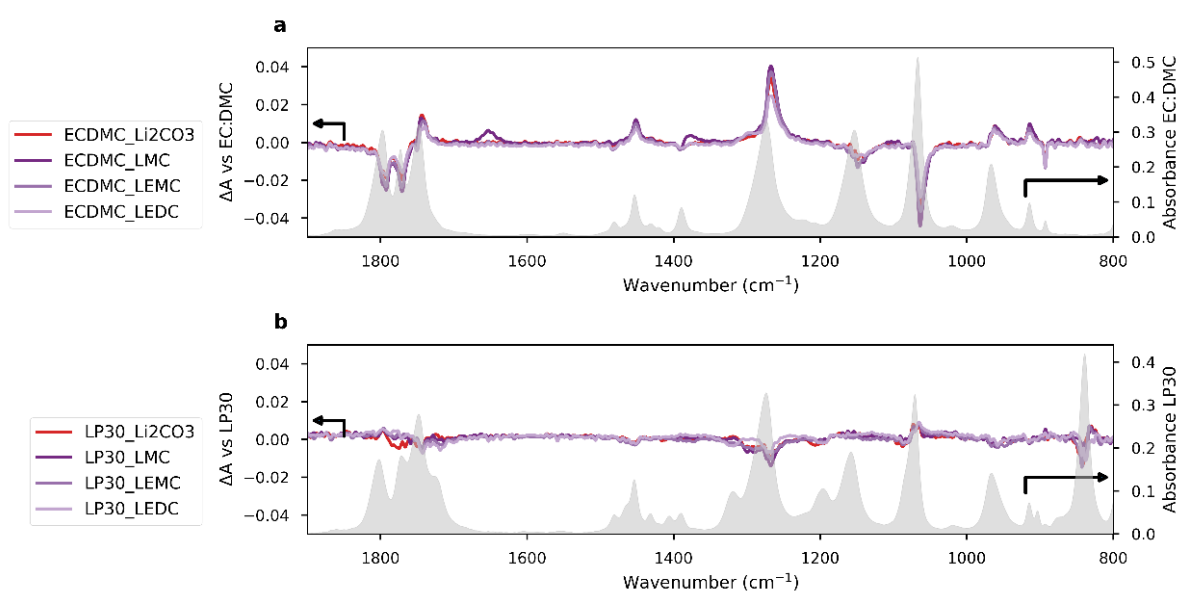

205

206 Supplementary Fig. 15. **a** ATR-FTIR spectrum of EC:DMC (1:1 w:w) solvent (grey, right axis) and difference spectra from  
 207 subtracting EC:DMC spectrum to spectra of saturated solution of  $\text{Li}_2\text{CO}_3$ , LMC, LEMC, LEDC in EC:DMC (left axis). **b** ATR-FTIR  
 208 infrared spectrum of LP30 electrolyte (grey, right axis) and difference spectra from subtracting LP30 spectrum to spectra of  
 209 saturated solution of  $\text{Li}_2\text{CO}_3$ , LMC, LEMC, LEDC in LP30 (left axis).

210

## Supplementary: Discussing the electrochemical stability of TAS glass

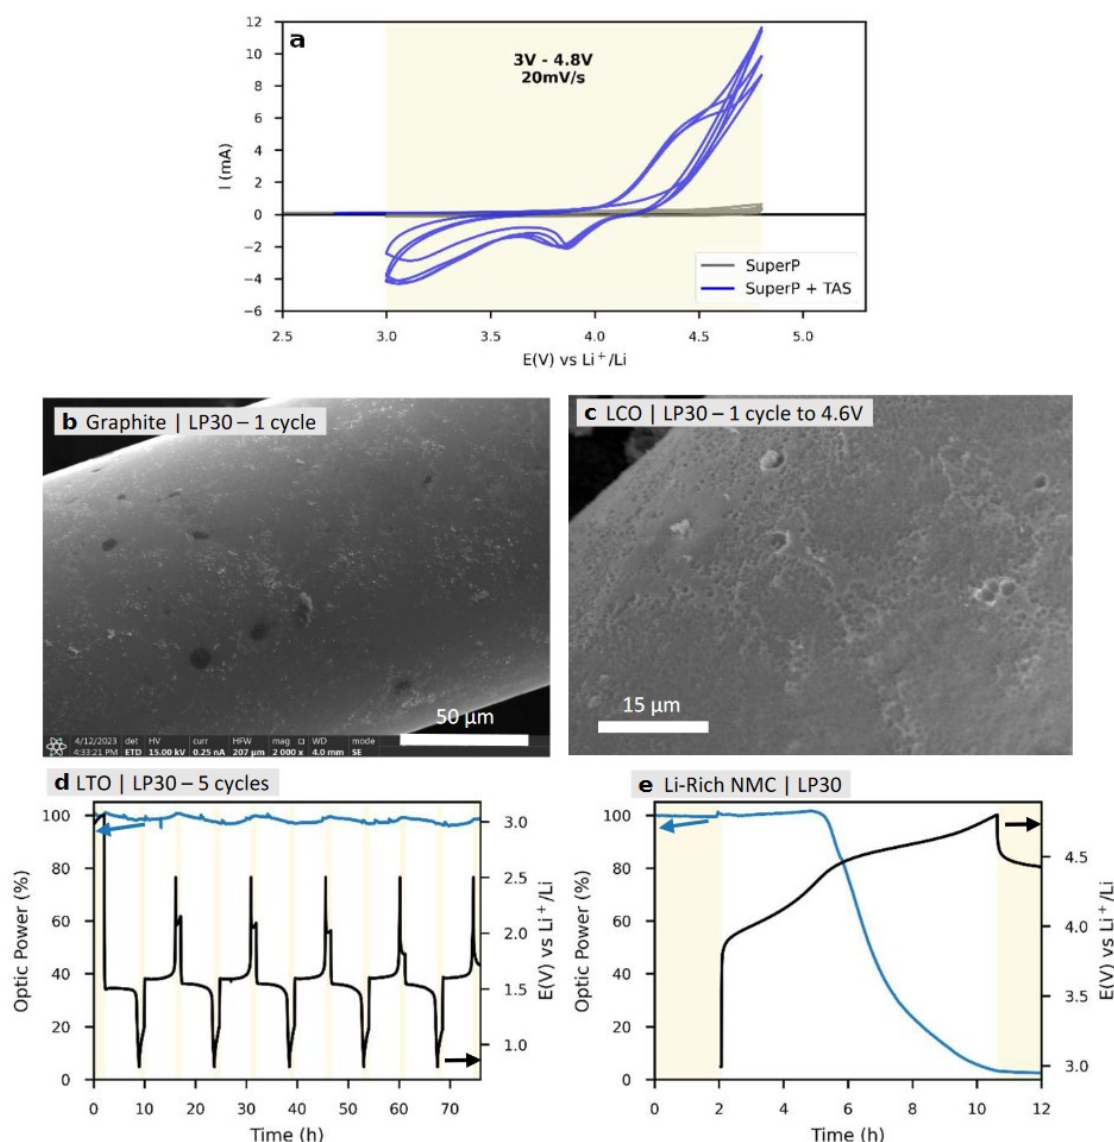

212

213 Supplementary Fig. 16. **Electrochemical stability of TAS fibre.** **a** CV of TAS:SuperP powder mix (blue curve) and SuperP powder  
 214 (grey curve) between 3V and 4.8V. **b** Ex-situ SEM image of a TAS fibre cycled to 0 V in the electrode of a graphite|LP30|Li cell;  
 215 **c**, of a TAS fibre after 1 cycle in a LCO|LP30|Li cell, with 4.6V cut-off potential. **d** Evolution of the optic power transmitted  
 216 through the fibre compared to initial value (left axis, blue) and cell potential (right axis, black) during 'long-cycling' operando  
 217 experiment of LTO|LP30|Li cell; **e** same with a Li-Rich NMC|LP30|Li cell.

218 To assess the electrochemical stability of TAS glass, fragments of fibre were ground with conductive  
 219 carbon SuperP (ratio 9:1 w/w) to increase both the surface area and the contact between the fibre and  
 220 the carbon and therefore its reactivity, and assembled into 10 mg-loaded LP30 half-cells. Half-cells  
 221 loaded with 1mg of SuperP were equally prepared as reference. When cycling over the 0-2V range,  
 222 similar long-term cycling curves were observed comparing the TAS-containing carbon electrode and  
 223 the TAS-free carbon electrode. This was confirmed by the SEM picture of a TAS fibre that has been  
 224 cycled to 0 V, which general smoothness was preserved as shown in Supplementary Fig. 16b.

225 In contrast, a minor oxidative current onset is seen at 4.2 V and then increases strongly (blue curve in  
 226 Supplementary Fig. 16a) upon further increasing the oxidation current. Under the same conditions,  
 227 the TAS-free cell barely shows any oxidation current. This is indicative of degradation of the TAS fibre  
 228 at high voltage (>4.3 V) and is further confirmed by the corrosion pits observed on the SEM picture of

229 a fibre cycled to 4.6 V (Supplementary Fig. 16a). Noteworthy, the reductive current between 3V and  
230 4V is attributed to subsequent reduction of the primarily oxidized species and was not observed when  
231 limiting the scan to 4V.

232 To further confirm this range of stability in operando conditions, we compare the LTO/LP30/Li metal  
233 cell of Figure 7 with a Li-rich-NMC/LP30/Li metal cell, having the TAS fibre in the LTO and Li-rich NMC  
234 electrode, respectively. Note the constancy of the optic power guided through the fibre upon cycling  
235 for the LTO-based cell, while the optical power drastically drops for the Li-rich NMC cell at a voltage of  
236 nearly 4.3V, coinciding with the onset of the oxidation current observed by cyclic-voltammetry  
237 measurements. For sake of completeness, we should emphasize that the overall stability window (0-  
238 4.3V) may slightly change depending upon the electrolytes used.

239

240



## Supplementary: MCR-ALS of Cu-PdVf samples with varying electrolyte

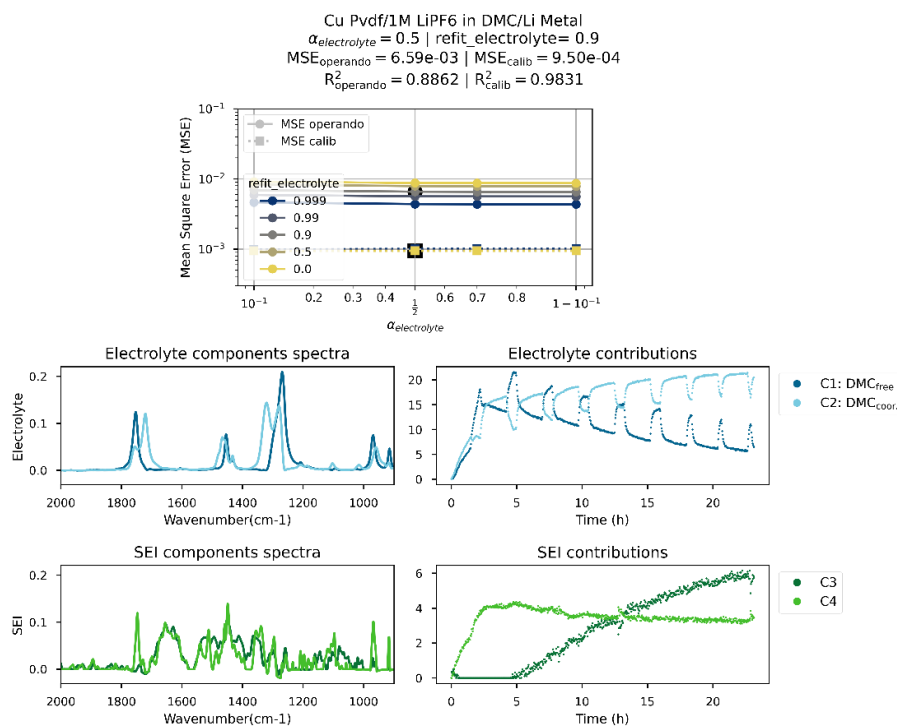

242

243 Supplementary Fig. 17. Detailed MCR-ALS for the Cu-PVDF | 1M LiPF<sub>6</sub> in DMC | Li cell. MSE of operando and calibration  
 244 spectra (solid and dashed lines, respectively), for several values of  $\alpha_{electrolyte}$  and electrolyte refitting parameter (upper  
 245 panel). The decomposition reported in the main text is highlighted with black markers, and detailed on the four lower panels:  
 246 spectra (left panels) and associated contributions (right panels) for electrolyte (middle panels) and SEI components (lower  
 247 panels).

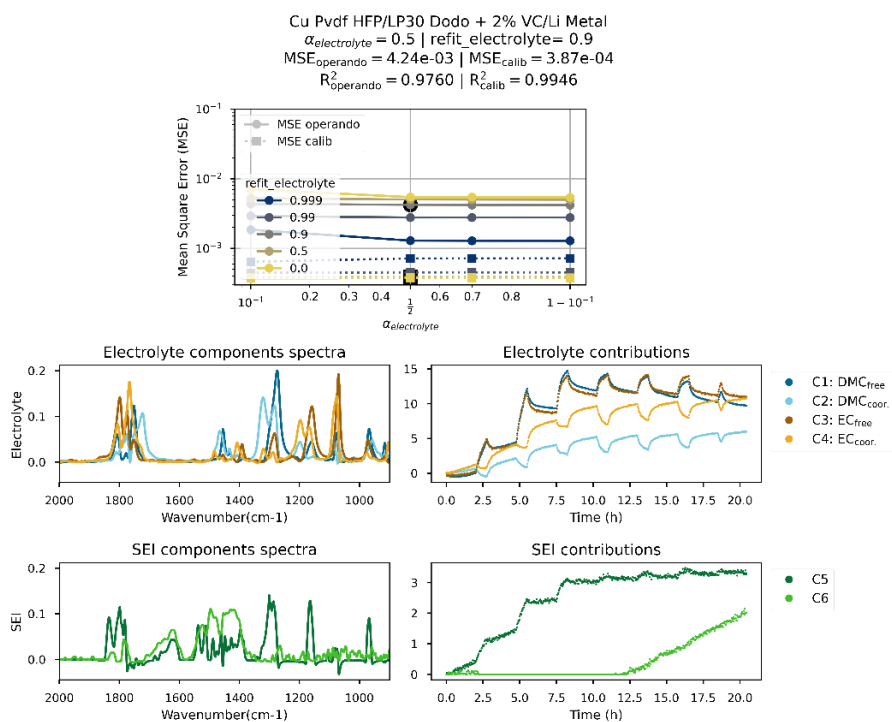

248

249 Supplementary Fig. 18. Detailed MCR-ALS for the Cu-PVDF | LP30+2%VC | Li cell. MSE of operando and calibration  
 250 spectra (solid and dashed lines, respectively), for several values of  $\alpha_{electrolyte}$  and electrolyte refitting parameter (upper  
 251 panel). The decomposition reported in the main text is highlighted with black markers, and detailed on the four lower panels:  
 252 spectra (left panels) and associated contributions (right panels) for electrolyte (middle panels) and SEI components (lower panels).

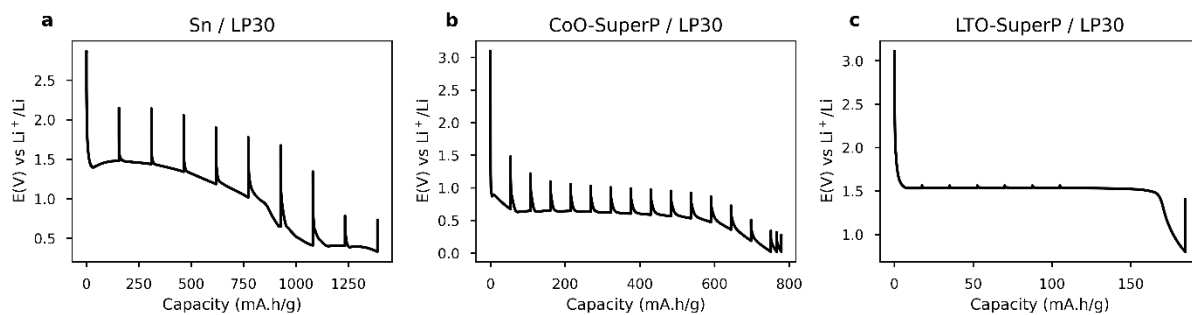

253  
254 Supplementary Fig. 19. Reduction specific capacity for the three electrode materials: **a**, Sn; **b**, CoO/SuperP; **c**, LTO/SuperP.

255  
256 **Supplementary - Commercial Electrolyte reduction on various electrode material**

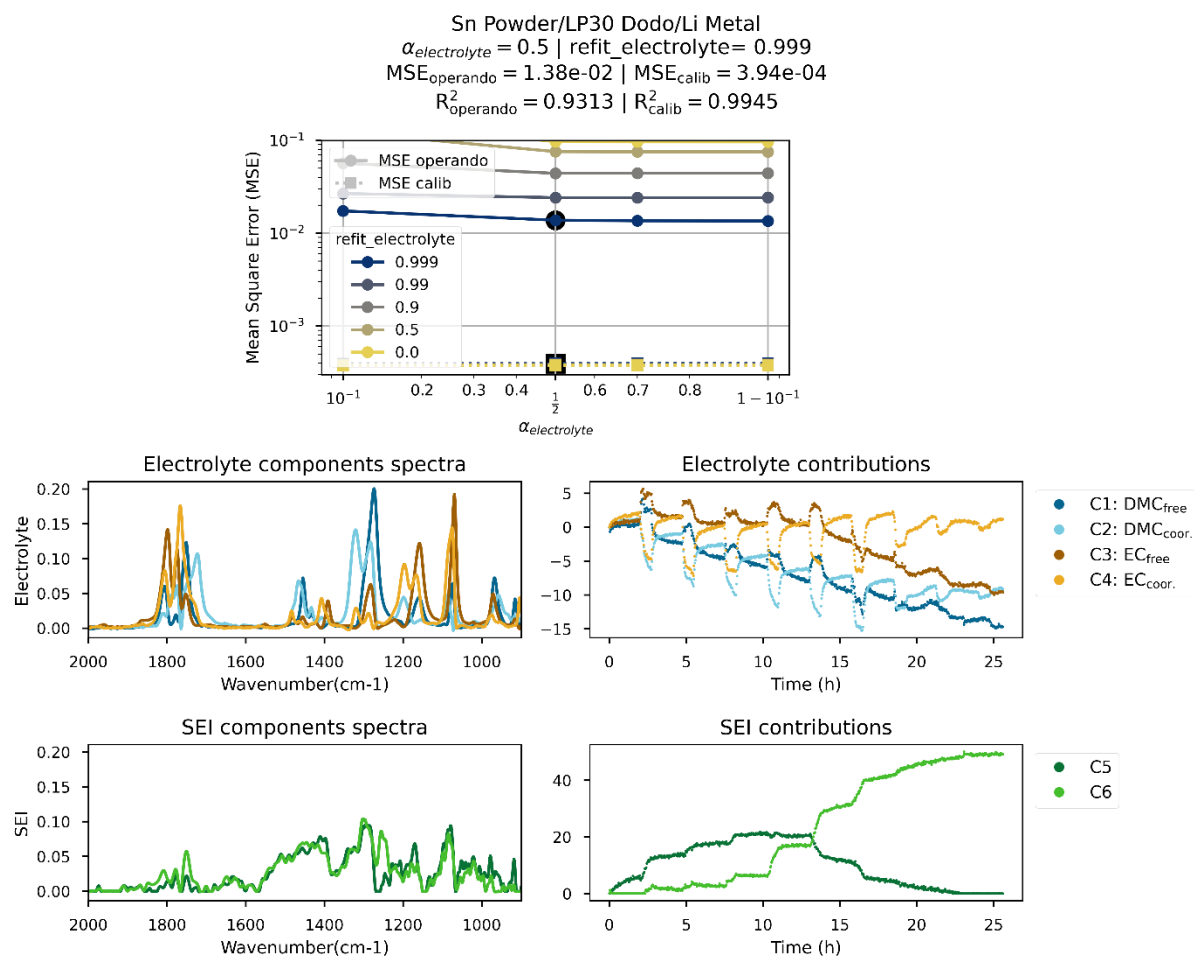

257  
258 Supplementary Fig. 20. Detailed MCR-ALS for the Sn | LP30 | Li cell. MSE of operando and calibration spectra (solid and  
259 dashed lines, respectively), for several values of  $\alpha_{electrolyte}$  and electrolyte refitting parameter (upper panel). The  
260 decomposition reported in the main text is highlighted with black markers, and detailed on the four lower panels: spectra  
261 (left panels) and associated contributions (right panels) for electrolyte (middle panels) and SEI components (lower panels).

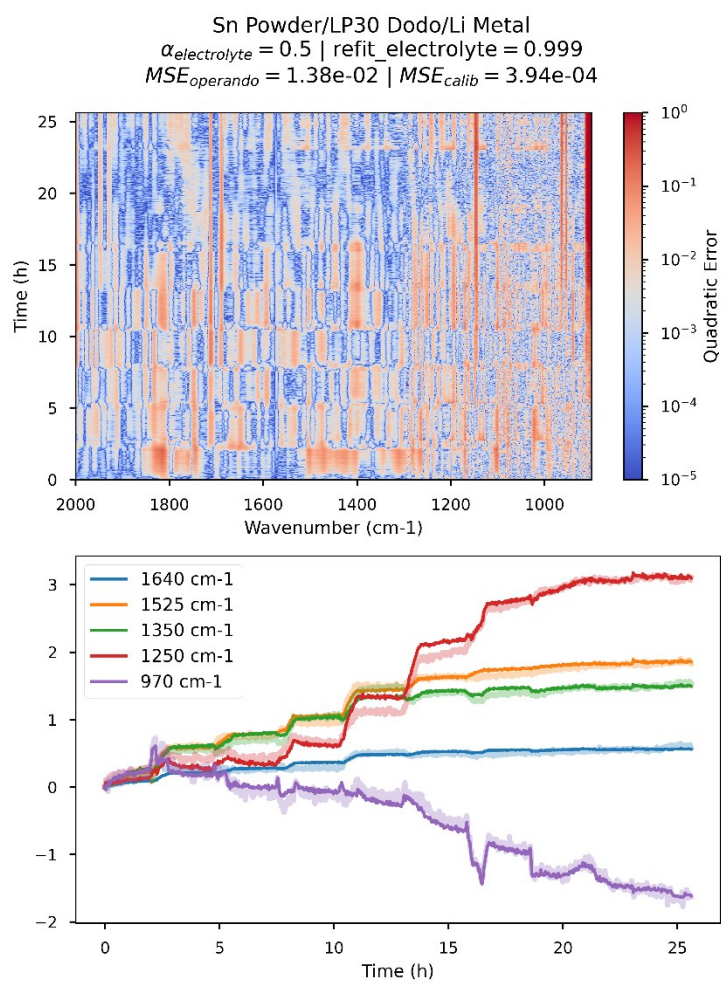

262

263 Supplementary Fig. 21. **Detailed MCR-ALS for the Sn | LP30 | Li cell.** Quadratic error between operando data D and  
 264 reconstructed from MCR-ALS (CS<sup>T</sup>) (upper panel). Comparison of operando data D (transparent lines) and reconstructed data  
 265 from MCR-ALS (CS<sup>T</sup>) (solid lines) at selected wavenumbers.

CoO/SuperP 90/10 SPEX 5min in Eth/CMC/LP30 Dodo/Li Metal

$\alpha_{electrolyte} = 0.7$  | refit\_electrolyte = 0.99

MSE<sub>operando</sub> = 1.78e-02 | MSE<sub>calib</sub> = 3.84e-04

R<sup>2</sup><sub>operando</sub> = 0.8653 | R<sup>2</sup><sub>calib</sub> = 0.9946

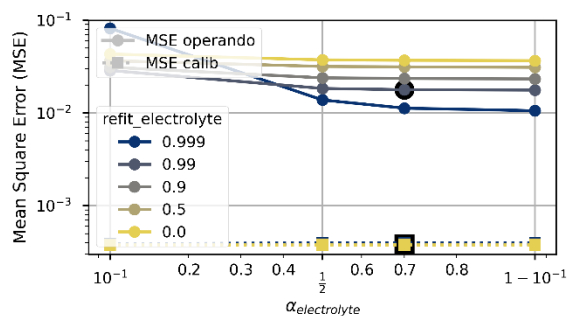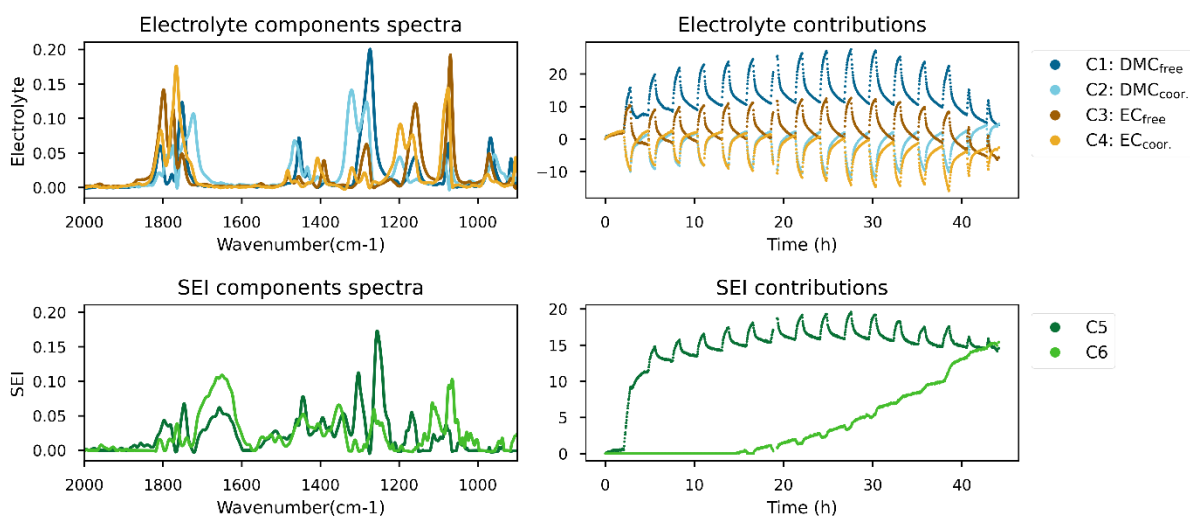

266

267 Supplementary Fig. 22. **Detailed MCR-ALS for the CoO/SuperP | LP30 | Li cell.** MSE of operando and calibration spectra (solid  
 268 and dashed lines, respectively), for several values of  $\alpha_{electrolyte}$  and electrolyte refitting parameter (upper panel). The  
 269 decomposition reported in the main text is highlighted with black markers, and detailed on the four lower panels: spectra  
 270 (left panels) and associated contributions (right panels) for electrolyte (middle panels) and SEI components (lower panels).

CoO/SuperP 90/10 SPEX 5min in Eth/CMC/LP30 Dodo/Li Metal  
 $\alpha_{\text{electrolyte}} = 0.7$  |  $\text{refit\_electrolyte} = 0.99$   
 $MSE_{\text{operando}} = 1.78\text{e-}02$  |  $MSE_{\text{calib}} = 3.84\text{e-}04$

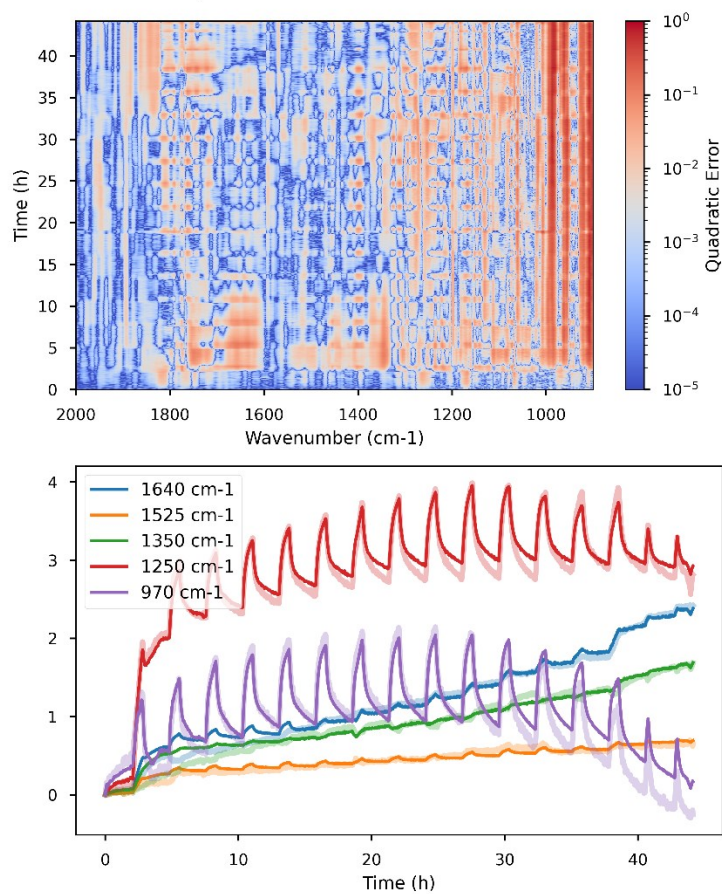

271

272 Supplementary Fig. 23. **Detailed MCR-ALS for the CoO/SuperP | LP30 | Li cell.** Quadratic error between operando data D  
273 and reconstructed from MCR-ALS (CS<sup>T</sup>) (upper panel). Comparison of operando data D (transparent lines) and reconstructed  
274 data from MCR-ALS (CS<sup>T</sup>) (solid lines) at selected wavenumbers.

LTO/SuperP 90/10/LP30 Dodo/Li Metal  
 $\alpha_{electrolyte} = 0.7$  | refit\_electrolyte = 0.999  
 $MSE_{operando} = 7.04e-03$  |  $MSE_{calib} = 3.88e-04$   
 $R^2_{operando} = 0.9462$  |  $R^2_{calib} = 0.9945$

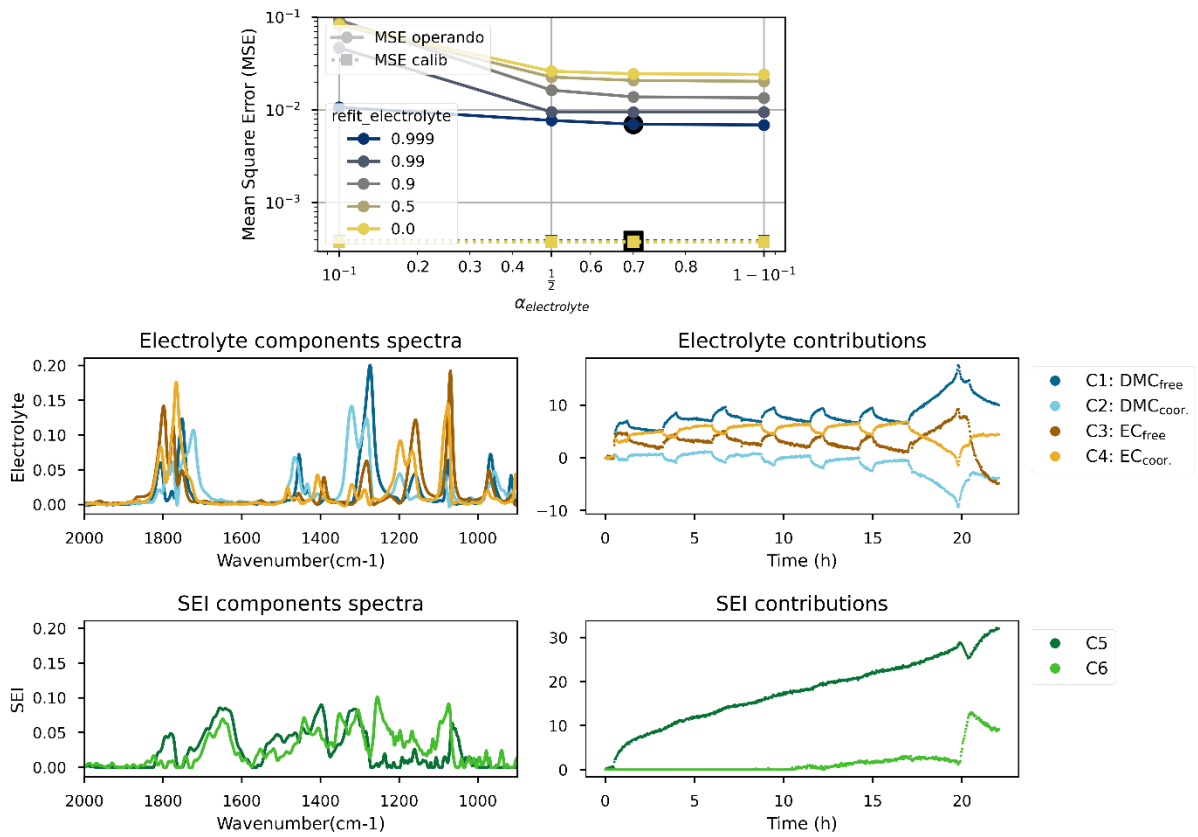

275

276 Supplementary Fig. 24. **Detailed MCR-ALS for the LTO/SuperP | LP30 | Li cell.** MSE of operando and calibration spectra (solid  
 277 and dashed lines, respectively), for several values of  $\alpha_{electrolyte}$  and electrolyte refitting parameter (upper panel). The  
 278 decomposition reported in the main text is highlighted with black markers, and detailed on the four lower panels: spectra  
 279 (left panels) and associated contributions (right panels) for electrolyte (middle panels) and SEI components (lower panels).

LTO/SuperP 90/10/LP30 Dodo/Li Metal  
 $\alpha_{\text{electrolyte}} = 0.7$  |  $\text{refit\_electrolyte} = 0.999$   
 $MSE_{\text{operando}} = 7.04\text{e-}03$  |  $MSE_{\text{calib}} = 3.88\text{e-}04$

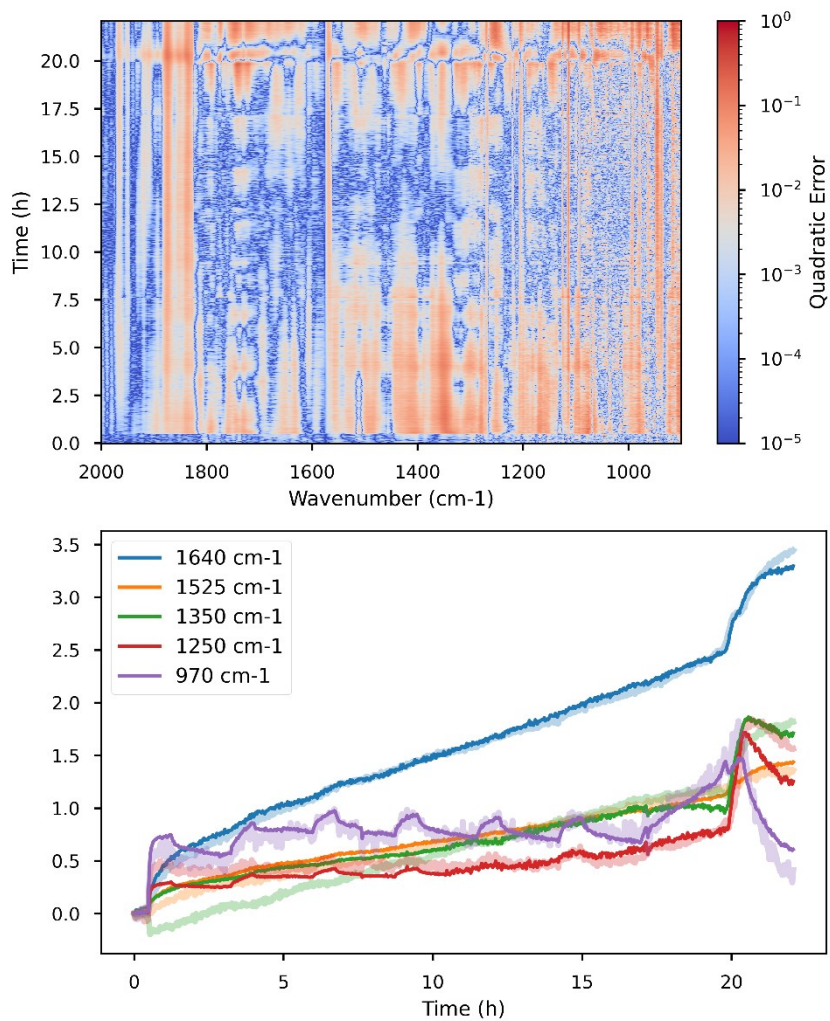

280

281 Supplementary Fig. 25. **Detailed MCR-ALS for the LTO/SuperP | LP30 | Li cell.** Quadratic error between operando data D and  
282 reconstructed from MCR-ALS (CS<sup>T</sup>) (upper panel). Comparison of operando data D (transparent lines) and reconstructed data  
283 from MCR-ALS (CS<sup>T</sup>) (solid lines) at selected wavenumbers.

284

### Supplementary - Commercial electrolyte reduction on LTO – 4000-2600 $\text{cm}^{-1}$ range

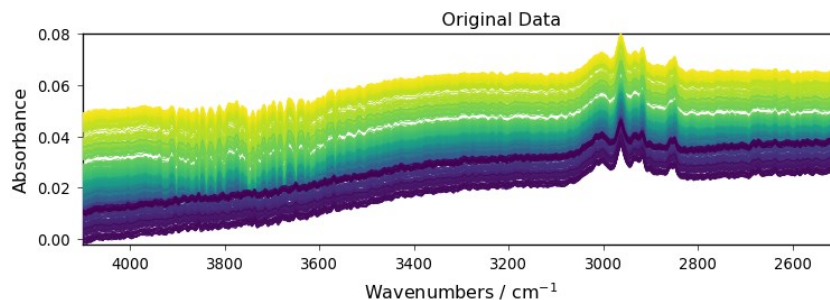

285

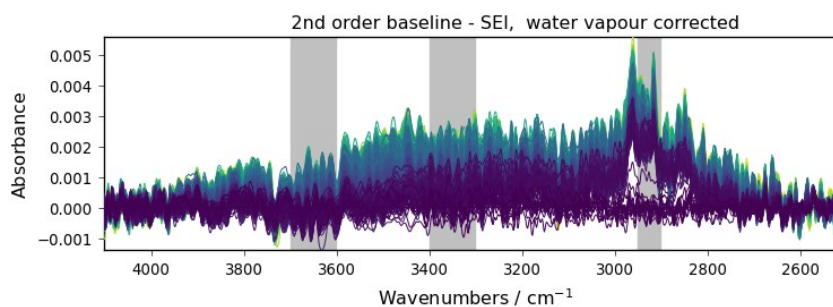

286

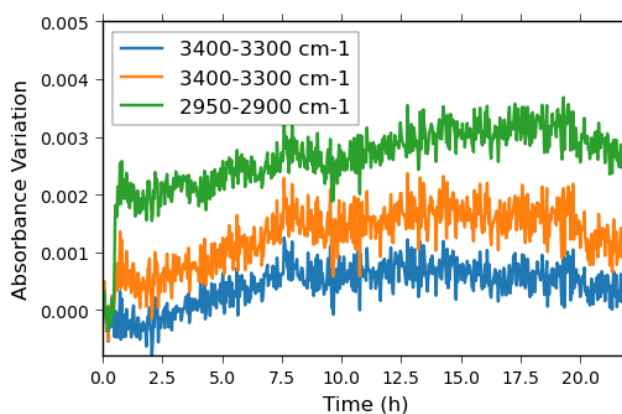

287

288 Supplementary Fig. 26. Focus on the 4000-2500  $\text{cm}^{-1}$  region for reduction in LTO half-cell: **upper panel**, Absorbance spectra  
 289 (original data), as acquired by the spectrometer; **middle panel**,  $A(t)-A(t_0)$ , corrected for water vapour and baseline (2<sup>nd</sup>  
 290 order polynomial fitted in the 4100-3950  $\text{cm}^{-1}$  and 2600-2500  $\text{cm}^{-1}$  regions); **lower panel**, temporal evolution in three averaged  
 291 wavenumber ranges (blue ,3700-3600  $\text{cm}^{-1}$ ;orange, 3400-3300  $\text{cm}^{-1}$ ; green, 2950-2900  $\text{cm}^{-1}$ ). The absorbance in the 3400-  
 292 3300  $\text{cm}^{-1}$  range, corresponding to the maximum of -OH band of LEMC do not show any distinct evolution compared to the  
 293 other ranges. Hence, the -OH band characteristic of LEMC is not detectable.

294 The identification of the semi-carbonate presented relies on reference spectra found in the literature.  
 295 While LMC spectrum is well documented, Wang et al. questioned the validity of the preceding LEDC  
 296 synthesis method [Wang et al. *Nat. Chem.* (2019)], evidencing troubling resemblance between the FTIR  
 297 spectrum of lithium ethyl mono-carbonate (LEMC) they prepared, and previous spectra reported as  
 298 LEDC [Zhuang et al. *J. Phys. Chem. B* (2005)]. Doing so, they suggested that the SEI is made up of LEMC  
 299 rather than LEDC, even though no clear evidenced formation mechanism was proposed. While the  
 300 presence of given semi-carbonates have be evidenced is specific cases, the exact nature of the species  
 301 present remains a matter of discussion in the general case. Our data on LTO shows the same strong  
 302 bands at 1400  $\text{cm}^{-1}$  and 1300  $\text{cm}^{-1}$  as LEMC or initial reports of LEDC (Figure 6f), but the characteristic  
 303 LEMC -OH band was not detectable within the accuracy of our experiment. (Supplementary Fig. 26).  
 304 Additional work will be necessary to come up with a comprehensive model of semi-carbonate  
 305 compositions.



Supplementary – Assessing the repeatability of  $A(t)-A(t_0)$  amplitudes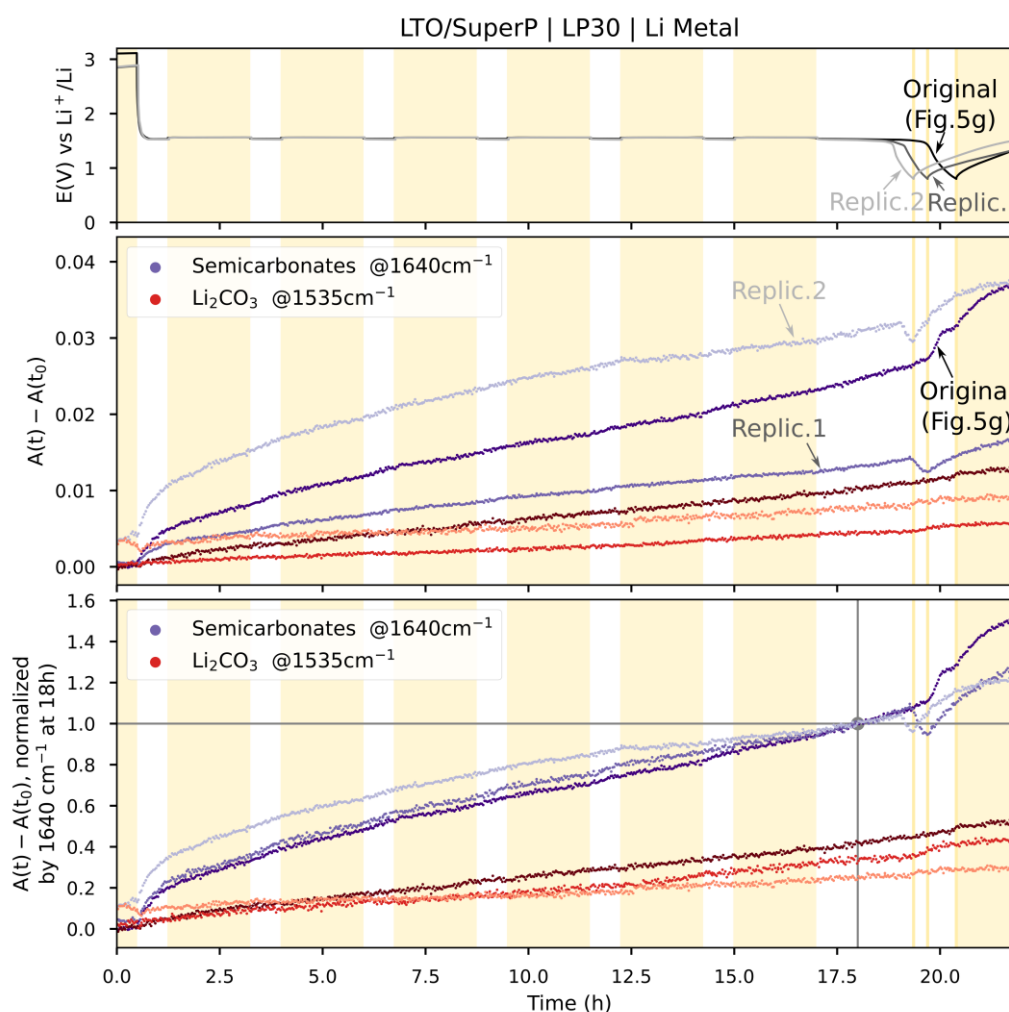

307

308 Supplementary Fig. 27. Comparison of GITT protocols of three LTO/SuperP|LP30|Li Metal cells, including the cell presented  
 309 in Figure 5g. **Upper panel**, GITT cycling curve, OCV periods are represented in yellow. Timescale were shifted to align to the  
 310 beginning of the first reduction. **Middle panel**, evolution of the two wavenumbers representative of semi-carbonates and  
 311  $\text{Li}_2\text{CO}_3$ . **Lower panel**, same curves, normalized by the value of absorbance at  $1640\text{ cm}^{-1}$  after 18h.

312 Three LTO/SuperP|LP30|Li Metal cells were assembled and cycled to evaluate the reproducibility of  
 313 the spectra. While the three cells show very identical electrochemistry, it should be noted that  
 314 significant intensity differences are observed between experiments, which we attribute to variations  
 315 in sample preparation such as difference in fibre coverage, particle adhesion, and electrode cohesion  
 316 permitting electronic conductivity. Designing more systematic deposition methods should improve the  
 317 reproducibility of these intensities. However, once normalized, all these curves show similar trends.

318 Notably, they show a break in slope once leaving the 1.5V-insertion plateau, with decreased amount  
 319 of semi-carbonates, which was also repeatedly observed on long cycling data (see Supplementary Fig.  
 320 31). We presume that these artefacts could be due to the formation of other SEI species, undetectable  
 321 by mid-IR spectroscopy, but affecting the refractive index in the volume near the sensor surface and  
 322 thus impacting the penetration depth of the evanescent wave.

323

324 **Supplementary - Commercial electrolyte reduction on LTO – Longer Cycling**

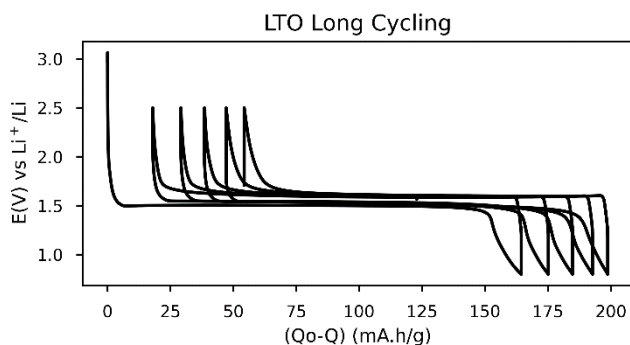

325

326 Supplementary Fig. 28. Voltage vs specific capacity for the long cycling LTO cell

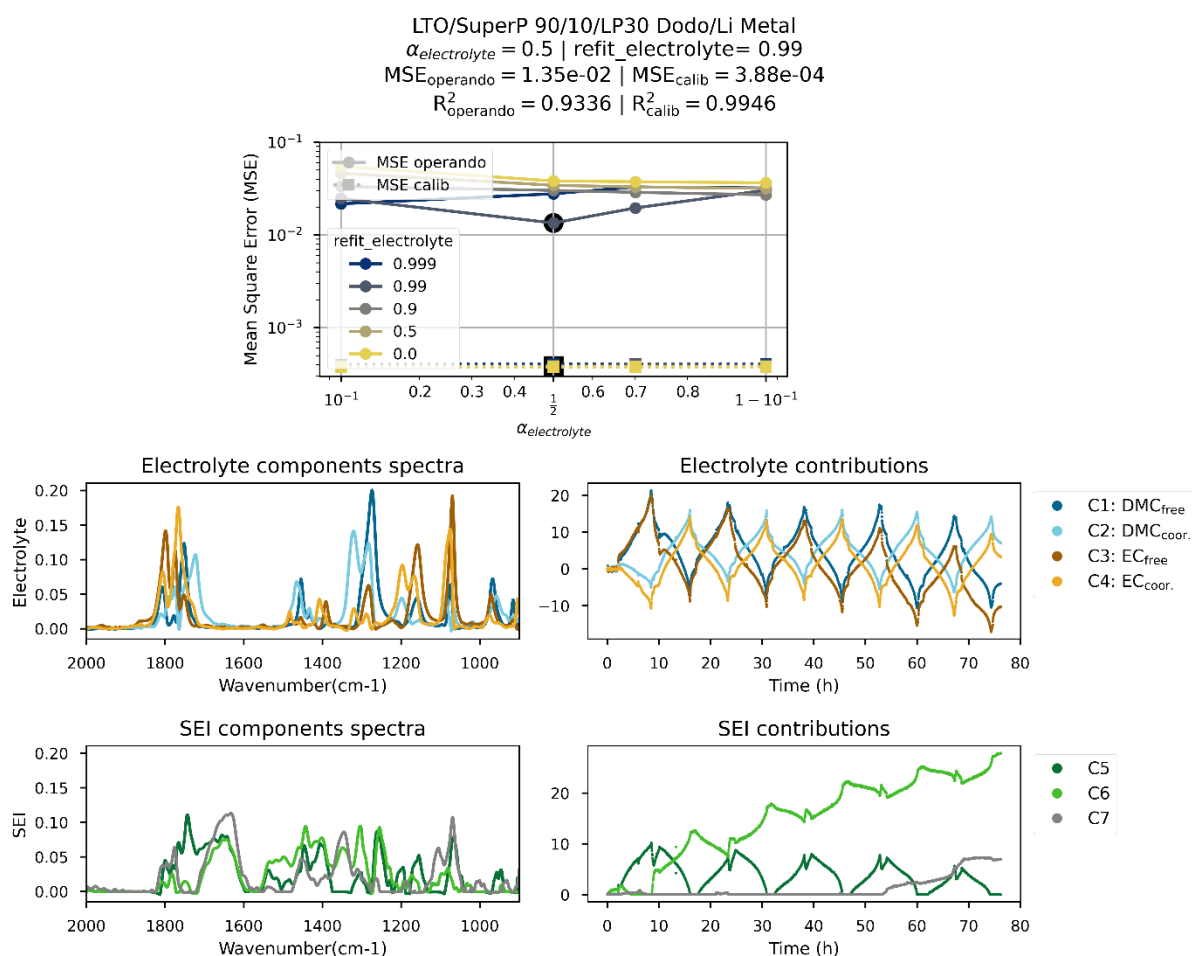

327

328 Supplementary Fig. 29. **Detailed MCR-ALS for the LTO/SuperP | LP30 | Li long cycling cell.** MSE of operando and calibration  
 329 spectra (solid and dashed lines, respectively), for several values of  $\alpha_{electrolyte}$  and electrolyte refitting parameter (upper  
 330 panel). The decomposition reported in the main text is highlighted with black markers, and detailed on the four lower panels:  
 331 spectra (left panels) and associated contributions (right panels) for electrolyte (middle panels) and SEI components (lower  
 332 panels).

LTO/SuperP 90/10/LP30 Dodo/Li Metal  
 $\alpha_{\text{electrolyte}} = 0.5$  |  $\text{refit\_electrolyte} = 0.99$   
 $MSE_{\text{operando}} = 1.35\text{e-}02$  |  $MSE_{\text{calib}} = 3.88\text{e-}04$

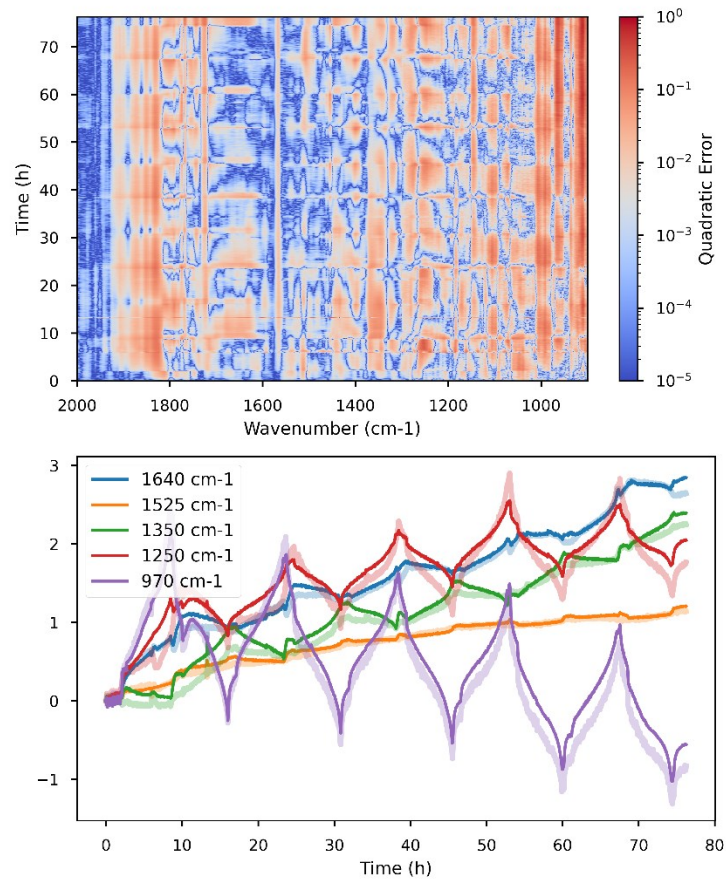

333

334 Supplementary Fig. 30. **Detailed MCR-ALS for the LTO/SuperP | LP30 | Li long cycling cell.** Quadratic error between operando  
335 data D and reconstructed from MCR-ALS ( $CS^T$ ) (upper panel). Comparison of operando data D (transparent lines) and  
336 reconstructed data from MCR-ALS ( $CS^T$ ) (solid lines) at selected wavenumbers.

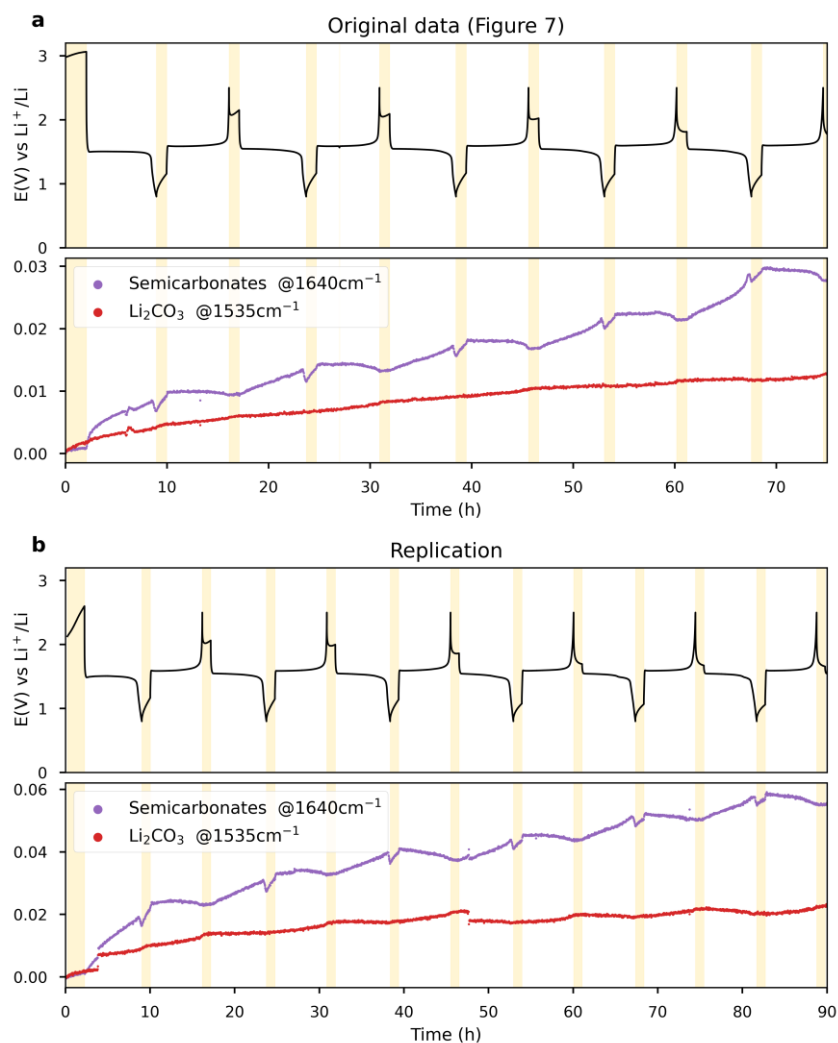

337

338 Supplementary Fig. 31. **Comparison of two long cycling protocols of LTO/SuperP|LP30|Li Metal cells** for **a**, the cell presented  
 339 in main text of the paper, **b**, a cell assembled in identical conditions. Upper panel: GITT trace, OCV periods are represented  
 340 in yellow; Lower panel:  $A(t)-A(t_0)$  evolution for the two wavenumbers representative of semi-carbonates and  $\text{Li}_2\text{CO}_3$ . While  
 341 the absolute absorbance vary with a two-fold between experiments, both curves show similar temporal evolution.

342

### Supplementary: Effect of carbon additives on the spectra

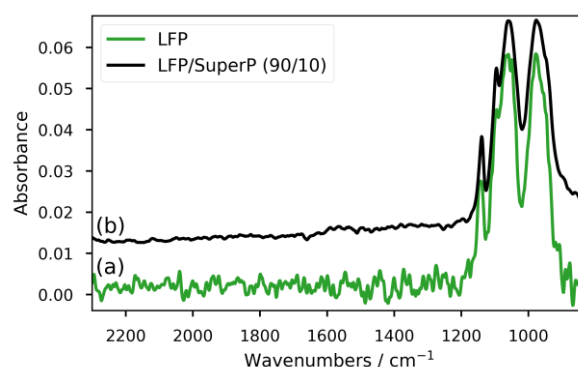

343

344 Supplementary Fig. 32. **Effect of carbon additive on spectra of a solid sample.** **a** IR-FEWS of LFP particles deposited on TAS  
 345 fibre via ethanol dispersion. **b** IR-FEWS of LFP/SuperP particles mixture on TAS fibre, showing an increased baseline due to  
 346 the carbon. In both cases, the background was acquired on a raw TAS fibre.

347
